# Supplementary material for: Isobaric Tags for Relative and Absolute Quantitation in Proteomic Analysis of Potential Biomarkers in Invasive Cancer, Ductal Carcinoma In Situ, and Mammary Fibroadenoma
Source: PubMed Central journal article supplement (PMC7640741; doi:10.3389/fonc.2020.574552), 2020-10-21

**a**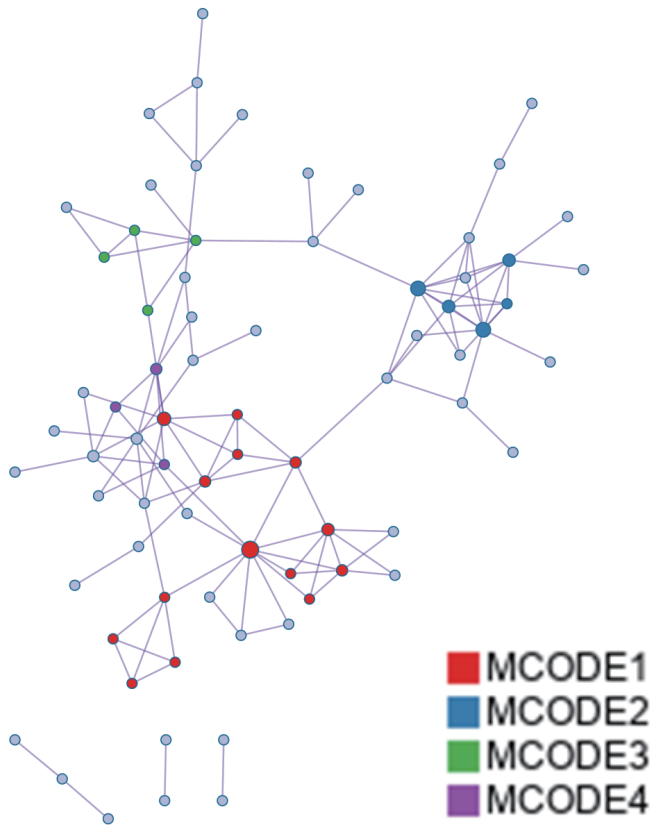**c**

| Color  | MCODE   | GO            | Description                                          | Log10(P) |
|--------|---------|---------------|------------------------------------------------------|----------|
| Red    | MCODE_1 | R-HSA-2168880 | Scavenging of heme from plasma                       | -13.4    |
| Red    | MCODE_1 | R-HSA-166665  | Terminal pathway of complement                       | -11.3    |
| Red    | MCODE_1 | R-HSA-2173782 | Binding and Uptake of Ligands by Scavenger Receptors | -10.6    |
| Green  | MCODE_3 | GO:0001819    | positive regulation of cytokine production           | -4.5     |
| Green  | MCODE_3 | GO:0001817    | regulation of cytokine production                    | -3.9     |
| Purple | MCODE_4 | M174          | PID UPA UPAR PATHWAY                                 | -8.3     |
| Purple | MCODE_4 | GO:0034113    | heterotypic cell-cell adhesion                       | -7.8     |
| Purple | MCODE_4 | M18           | PID INTEGRIN1 PATHWAY                                | -7.7     |

**b**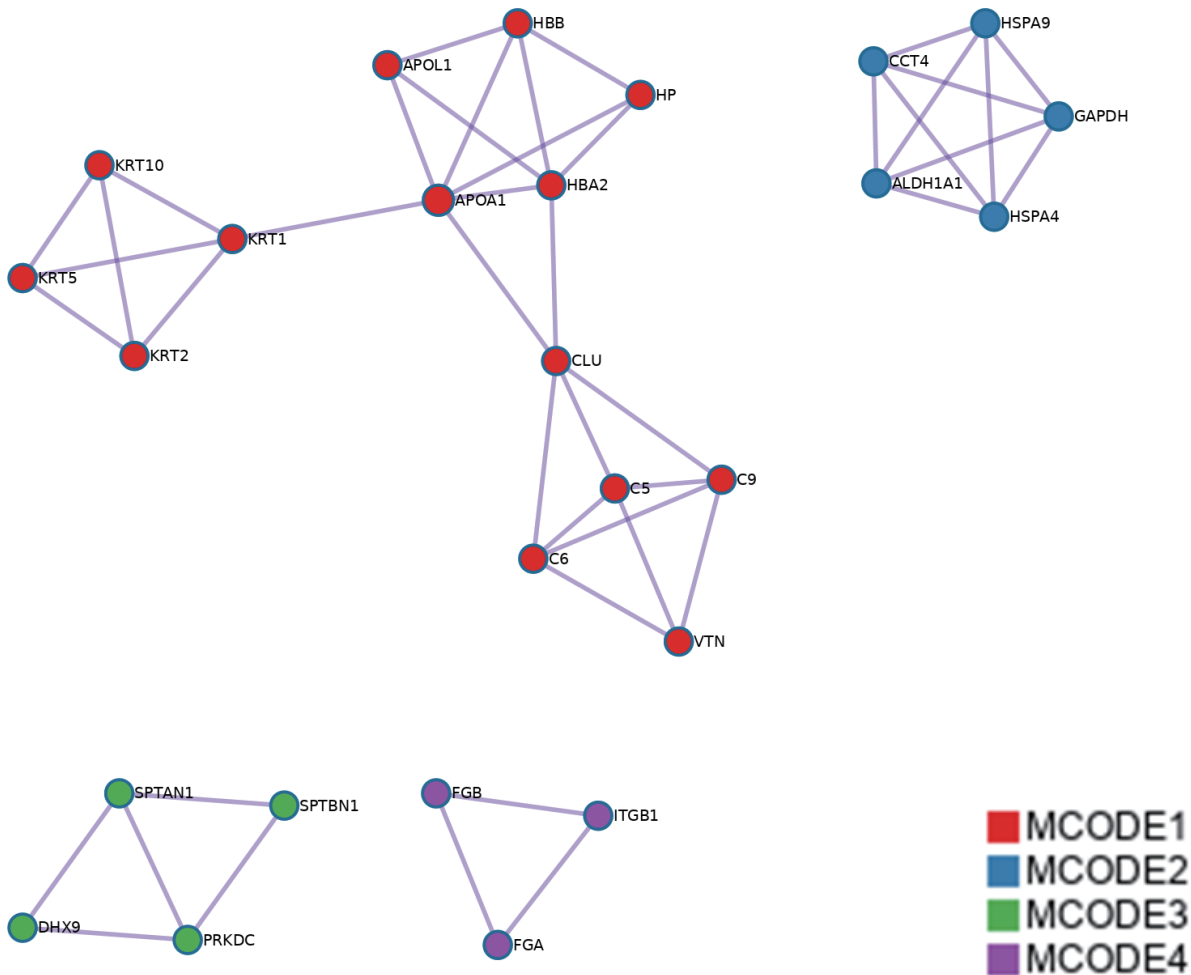

Supplement: Image_1.pdf [file Image_1.pdf]
