# Supplementary material for: Isobaric Tags for Relative and Absolute Quantitation in Proteomic Analysis of Potential Biomarkers in Invasive Cancer, Ductal Carcinoma In Situ, and Mammary Fibroadenoma
Source: PubMed Central journal article supplement (PMC7640741; doi:10.3389/fonc.2020.574552), 2020-10-21
Supplement: Image_2.pdf [file Image_2.pdf]

**a**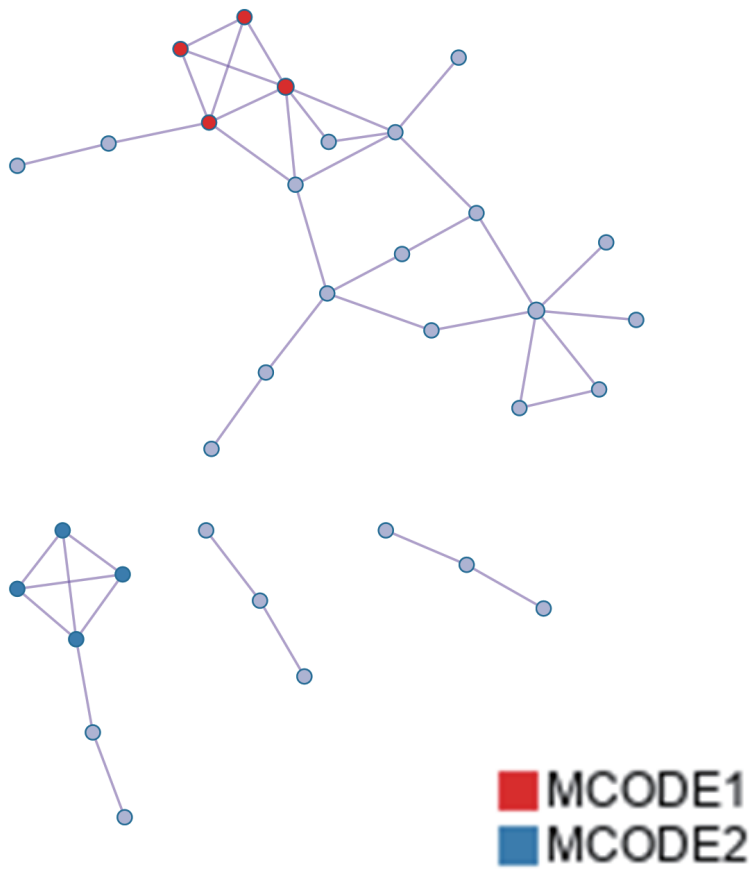**b**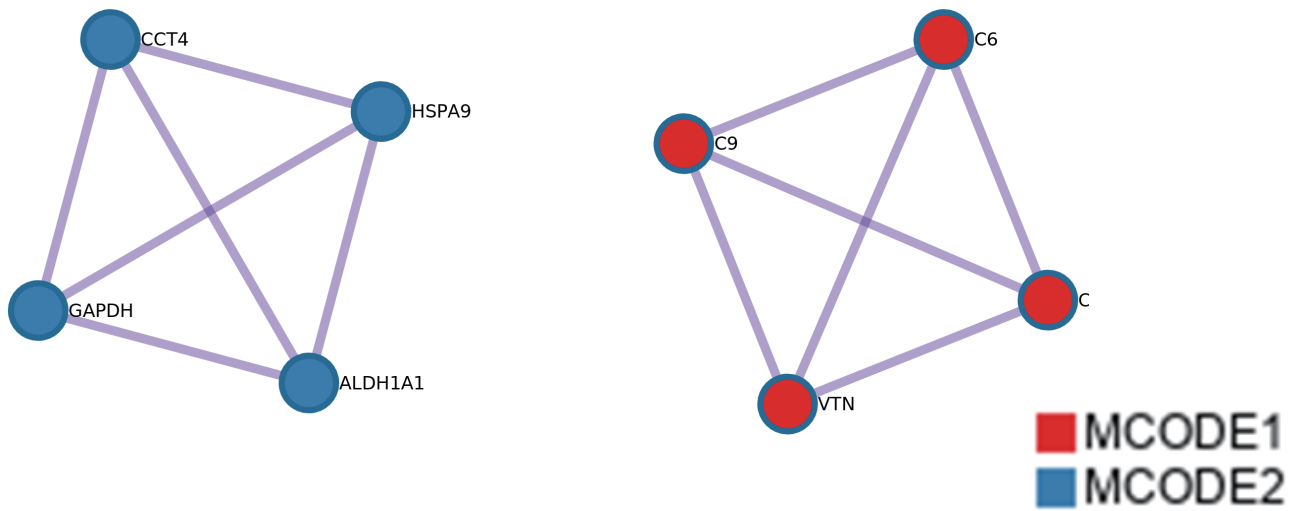**c**

| Color | MCODE   | GO           | Description                      | Log10(P) |
|-------|---------|--------------|----------------------------------|----------|
| ■     | MCODE_1 | R-HSA-977606 | Regulation of Complement cascade | -10.9    |
| ■     | MCODE_1 | R-HSA-166658 | Complement cascade               | -10.5    |
| ■     | MCODE_1 | R-HSA-166665 | Terminal pathway of complement   | -10.0    |
