# Supplementary material for: Isobaric Tags for Relative and Absolute Quantitation in Proteomic Analysis of Potential Biomarkers in Invasive Cancer, Ductal Carcinoma In Situ, and Mammary Fibroadenoma
Source: PubMed Central journal article supplement (PMC7640741; doi:10.3389/fonc.2020.574552), 2020-10-21
Supplement: Image_3.pdf [file Image_3.pdf]

**a**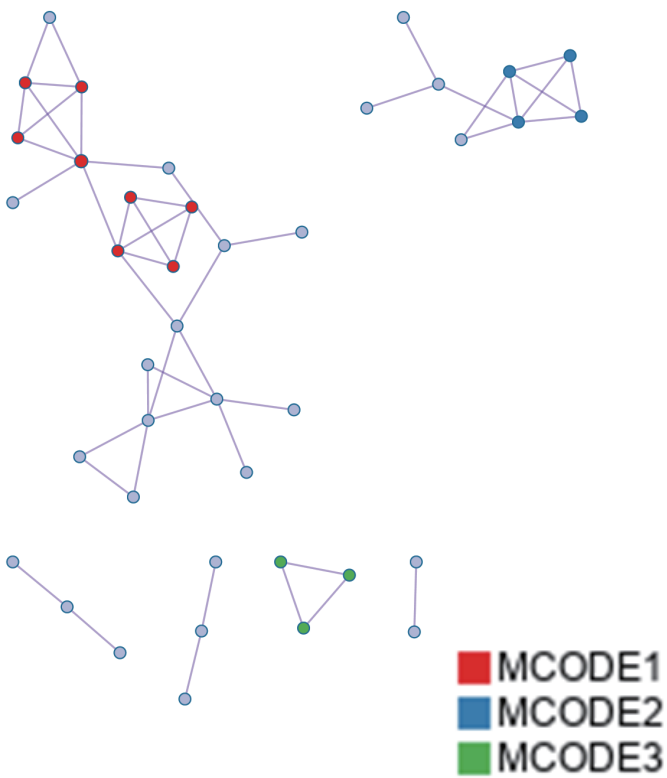**b**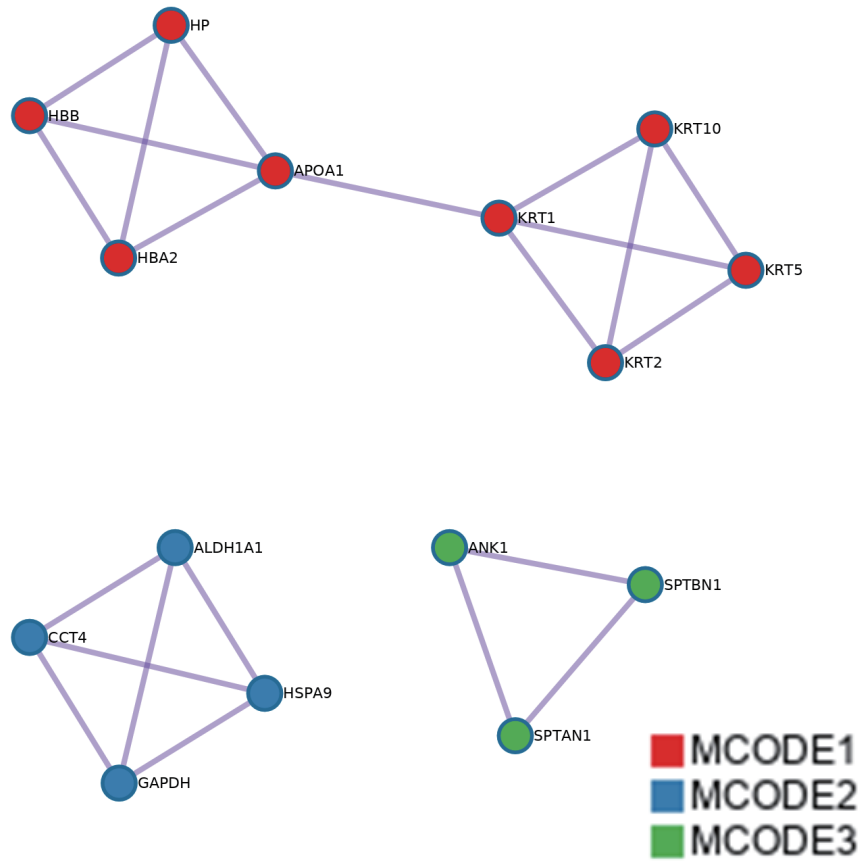**c**

| Color | MCODE   | GO            | Description                                          | Log10(P) |
|-------|---------|---------------|------------------------------------------------------|----------|
| ■     | MCODE_1 | R-HSA-2168880 | Scavenging of heme from plasma                       | -11.5    |
| ■     | MCODE_1 | R-HSA-2173782 | Binding and Uptake of Ligands by Scavenger Receptors | -9.3     |
| ■     | MCODE_1 | GO:0070268    | cornification                                        | -7.5     |
| ■     | MCODE_3 | R-HSA-445095  | Interaction between L1 and Ankyrins                  | -8.7     |
| ■     | MCODE_3 | R-HSA-6807878 | COPI-mediated anterograde transport                  | -7.1     |
| ■     | MCODE_3 | R-HSA-373760  | L1CAM interactions                                   | -6.9     |
