# Supplementary material for: Isobaric Tags for Relative and Absolute Quantitation in Proteomic Analysis of Potential Biomarkers in Invasive Cancer, Ductal Carcinoma In Situ, and Mammary Fibroadenoma
Source: Front Oncol. 2020 Oct 21;10:574552. doi: 10.3389/fonc.2020.574552 (PMC7640741; doi:10.3389/fonc.2020.574552)
Supplement: Supplementary Data sheet 4 — Annotation and enrichment informations of IBC vs DCIS-related proteins. [file DataSheet_4.xlsx]

## Sheet: Annotation
Input ID	Gene ID	Type	Tax ID	Homologene Gene ID	Homologene Gene Tax ID	Gene Symbol	Description	Biological Process (GO)	Protein Function (Protein Atlas)	Subcellular Location (Protein Atlas)	Drug (DrugBank)	Canonical Pathways	Hallmark Gene Sets	hsa04610 Complement and coagulation cas	GO:0002576 platelet degranulation	R-HSA-2168880 Scavenging of heme from plasma	GO:0030193 regulation of blood coagulatio	R-HSA-140877 Formation of Fibrin Clot (Clot	GO:0043062 extracellular structure organi	GO:0006953 acute-phase response	GO:0018149 peptide cross-linking	GO:0006957 complement activation, alterna	R-HSA-375165 NCAM signaling for neurite out	GO:0031639 plasminogen activation	GO:0030168 platelet activation	M5882 NABA PROTEOGLYCANS	GO:0009435 NAD biosynthetic process	GO:0050777 negative regulation of immune	hsa03320 PPAR signaling pathway	GO:0001895 retina homeostasis	GO:0031647 regulation of protein stabilit	GO:0007568 aging	GO:0014068 positive regulation of phospha
RRBP1	6238	symbol	H. sapiens	6238	H. sapiens	RRBP1	ribosome binding protein 1	GO:0001649 osteoblast differentiation;GO:0001503 ossification;GO:0006412 translation		Endoplasmic reticulum(Enhanced)				0.0	0.0	0.0	0.0	0.0	0.0	0.0	0.0	0.0	0.0	0.0	0.0	0.0	0.0	0.0	0.0	0.0	0.0	0.0	0.0
HSPA9	3313	symbol	H. sapiens	3313	H. sapiens	HSPA9	heat shock protein family A (Hsp70) member 9	GO:1902037 negative regulation of hematopoietic stem cell differentiation;GO:0045647 negative regulation of erythrocyte differentiation;GO:1901533 negative regulation of hematopoietic progenitor cell differentiation		Mitochondria(Enhanced)			(M5922)HALLMARK UNFOLDED PROTEIN RESPONSE; (M5936)HALLMARK OXIDATIVE PHOSPHORYLATION; (M5924)HALLMARK MTORC1 SIGNALING	0.0	0.0	1.0	0.0	0.0	0.0	0.0	0.0	0.0	0.0	0.0	0.0	0.0	0.0	1.0	0.0	0.0	1.0	0.0	0.0
PGK1	5230	symbol	H. sapiens	5230	H. sapiens	PGK1	phosphoglycerate kinase 1	GO:0061621 canonical glycolysis;GO:0061620 glycolytic process through glucose-6-phosphate;GO:1903862 positive regulation of oxidative phosphorylation	Enzymes/ENZYME proteins/Transferases		Adenosine-5'-[Beta, Gamma-Methylene]Triphosphate (Phosphoglycerate kinase activity);3-Phosphoglyceric Acid (Phosphoglycerate kinase activity)	(M44)PID HIF2PATHWAY; (M255)PID HIF1 TFPATHWAY	(M5937)HALLMARK GLYCOLYSIS; (M5891)HALLMARK HYPOXIA; (M5924)HALLMARK MTORC1 SIGNALING	1.0	0.0	1.0	0.0	0.0	0.0	0.0	0.0	0.0	0.0	1.0	0.0	1.0	1.0	0.0	0.0	0.0	0.0	1.0	0.0
GAPDH	2597	symbol	H. sapiens	2597	H. sapiens	GAPDH	glyceraldehyde-3-phosphate dehydrogenase	GO:0052501 positive regulation by organism of apoptotic process in other organism involved in symbiotic interaction;GO:0061621 canonical glycolysis;GO:0052042 positive regulation by symbiont of host programmed cell death	Enzymes/ENZYME proteins/Oxidoreductases	Cytosol;Plasma membrane(Enhanced)	NADH (Peptidyl-cysteine s-nitrosylase activity);Adenosine-5-Diphosphoribose (Peptidyl-cysteine s-nitrosylase activity);Thionicotinamide-Adenine-Dinucleotide (Peptidyl-cysteine s-nitrosylase activity);4-(2-AMINOETHYL)BENZENESULFONYL FLUORIDE (Peptidyl-cysteine s-nitrosylase activity)	(M66)PID MYC ACTIV PATHWAY; (M5493)WNT SIGNALING	(M5891)HALLMARK HYPOXIA; (M5924)HALLMARK MTORC1 SIGNALING	1.0	1.0	1.0	1.0	0.0	0.0	0.0	0.0	0.0	0.0	0.0	0.0	1.0	1.0	0.0	0.0	0.0	1.0	0.0	0.0
IARS2	55699	symbol	H. sapiens	55699	H. sapiens	IARS2	isoleucyl-tRNA synthetase 2, mitochondrial	GO:0006428 isoleucyl-tRNA aminoacylation;GO:0106074 aminoacyl-tRNA metabolism involved in translational fidelity;GO:0006418 tRNA aminoacylation for protein translation	Enzymes/ENZYME proteins/Ligase	Mitochondria(Enhanced)	L-Isoleucine (Isoleucine-trna ligase activity)			0.0	0.0	0.0	0.0	0.0	0.0	0.0	0.0	0.0	0.0	0.0	0.0	0.0	0.0	0.0	0.0	0.0	0.0	0.0	0.0
CCT4	10575	symbol	H. sapiens	10575	H. sapiens	CCT4	chaperonin containing TCP1 subunit 4	GO:1904871 positive regulation of protein localization to Cajal body;GO:1904869 regulation of protein localization to Cajal body;GO:1904874 positive regulation of telomerase RNA localization to Cajal body		Cytosol(Supported)Nucleoplasm(Approved)			(M5926)HALLMARK MYC TARGETS V1	0.0	0.0	0.0	0.0	0.0	0.0	0.0	0.0	0.0	0.0	0.0	0.0	0.0	0.0	0.0	0.0	1.0	1.0	0.0	0.0
Galactosidase						None	None	None	None	None	None	None	None	nan	nan	nan	nan	nan	nan	nan	nan	nan	nan	nan	nan	nan	nan	nan	nan	nan	nan	nan	nan
alpha						None	None	None	None	None	None	None	None	nan	nan	nan	nan	nan	nan	nan	nan	nan	nan	nan	nan	nan	nan	nan	nan	nan	nan	nan	nan
NAMPT	10135	symbol	H. sapiens	10135	H. sapiens	NAMPT	nicotinamide phosphoribosyltransferase	GO:1905377 response to D-galactose;GO:0034356 NAD biosynthesis via nicotinamide riboside salvage pathway;GO:0014916 regulation of lung blood pressure	Enzymes/ENZYME proteins/Transferases	Cell Junctions;Nuclear speckles(Approved)	GMX1777 (Nicotinate-nucleotide diphosphorylase (carboxylating) activity);N-[4-(1-BENZOYLPIPERIDIN-4-YL)BUTYL]-3-PYRIDIN-3-YLPROPANAMIDE (Nicotinate-nucleotide diphosphorylase (carboxylating) activity)		(M5932)HALLMARK INFLAMMATORY RESPONSE; (M5913)HALLMARK INTERFERON GAMMA RESPONSE; (M5924)HALLMARK MTORC1 SIGNALING	0.0	0.0	1.0	0.0	0.0	1.0	1.0	0.0	0.0	0.0	0.0	0.0	0.0	1.0	0.0	0.0	0.0	0.0	1.0	0.0
NNT	23530	symbol	H. sapiens	23530	H. sapiens	NNT	nicotinamide nucleotide transhydrogenase	GO:1903285 positive regulation of hydrogen peroxide catabolic process;GO:0006740 NADPH regeneration;GO:2000295 regulation of hydrogen peroxide catabolic process	Enzymes/ENZYME proteins/Oxidoreductases	Mitochondria(Enhanced)	NADH (Nadp binding);7-thionicotinamide-adenine-dinucleotide phosphate (Nadp binding);2'-Monophosphoadenosine 5'-Diphosphoribose (Nadp binding)		(M5936)HALLMARK OXIDATIVE PHOSPHORYLATION; (M5945)HALLMARK HEME METABOLISM	0.0	0.0	1.0	0.0	0.0	0.0	0.0	0.0	0.0	0.0	0.0	0.0	0.0	1.0	0.0	0.0	0.0	0.0	0.0	0.0
WFS1	7466	symbol	H. sapiens	7466	H. sapiens	WFS1	wolframin ER transmembrane glycoprotein	GO:1903892 negative regulation of ATF6-mediated unfolded protein response;GO:1903891 regulation of ATF6-mediated unfolded protein response;GO:2000675 negative regulation of type B pancreatic cell apoptotic process	Transporters/Accessory Factors Involved in Transport				(M5922)HALLMARK UNFOLDED PROTEIN RESPONSE; (M5906)HALLMARK ESTROGEN RESPONSE EARLY; (M5907)HALLMARK ESTROGEN RESPONSE LATE	1.0	0.0	0.0	1.0	1.0	0.0	0.0	0.0	0.0	0.0	0.0	0.0	0.0	0.0	0.0	0.0	1.0	1.0	0.0	0.0
KRT10	3858	symbol	H. sapiens	3858	H. sapiens	KRT10	keratin 10	GO:0070268 cornification;GO:0051290 protein heterotetramerization;GO:0051291 protein heterooligomerization						0.0	0.0	0.0	0.0	0.0	0.0	0.0	1.0	1.0	0.0	0.0	0.0	0.0	0.0	0.0	0.0	0.0	0.0	0.0	0.0
KRT1	3848	symbol	H. sapiens	3848	H. sapiens	KRT1	keratin 1	GO:0042730 fibrinolysis;GO:0001867 complement activation, lectin pathway;GO:0061436 establishment of skin barrier				(M223)PID BETA CATENIN NUC PATHWAY	(M5956)HALLMARK KRAS SIGNALING DN; (M5950)HALLMARK ALLOGRAFT REJECTION	1.0	1.0	1.0	1.0	0.0	0.0	1.0	1.0	0.0	0.0	0.0	0.0	0.0	0.0	1.0	0.0	1.0	0.0	0.0	0.0
PIP	5304	symbol	H. sapiens	5304	H. sapiens	PIP	prolactin induced protein	GO:0070233 negative regulation of T cell apoptotic process;GO:0070232 regulation of T cell apoptotic process;GO:0070229 negative regulation of lymphocyte apoptotic process						0.0	0.0	0.0	0.0	0.0	0.0	0.0	0.0	0.0	0.0	0.0	0.0	0.0	0.0	0.0	0.0	1.0	0.0	0.0	0.0
KRT2	3849	symbol	H. sapiens	3849	H. sapiens	KRT2	keratin 2	GO:0032980 keratinocyte activation;GO:0003334 keratinocyte development;GO:0070268 cornification		Cytosol;Golgi apparatus;Intermediate filaments(Approved)				0.0	0.0	0.0	0.0	0.0	0.0	0.0	1.0	0.0	1.0	0.0	0.0	0.0	0.0	0.0	0.0	0.0	0.0	0.0	0.0
DCN	1634	symbol	H. sapiens	1634	H. sapiens	DCN	decorin	GO:0030208 dermatan sulfate biosynthetic process;GO:1900747 negative regulation of vascular endothelial growth factor signaling pathway;GO:0030207 chondroitin sulfate catabolic process			Tris (Poly(a) rna binding)	(M5882)NABA PROTEOGLYCANS; (M65)PID FRA PATHWAY; (M5884)NABA CORE MATRISOME	(M5902)HALLMARK APOPTOSIS; (M5937)HALLMARK GLYCOLYSIS; (M5891)HALLMARK HYPOXIA	0.0	0.0	0.0	1.0	0.0	1.0	0.0	1.0	0.0	0.0	0.0	0.0	1.0	0.0	0.0	0.0	0.0	0.0	1.0	1.0
KRT6E	286887	gene_synonym	H. sapiens	286887	H. sapiens	KRT6C	keratin 6C	GO:0070268 cornification;GO:0031424 keratinization;GO:0045104 intermediate filament cytoskeleton organization		Intermediate filaments(Supported)				0.0	0.0	0.0	0.0	0.0	0.0	0.0	1.0	0.0	0.0	0.0	0.0	0.0	0.0	0.0	0.0	0.0	0.0	0.0	0.0
AMBP	259	symbol	H. sapiens	259	H. sapiens	AMBP	alpha-1-microglobulin/bikunin precursor	GO:0042167 heme catabolic process;GO:0046329 negative regulation of JNK cascade;GO:0032873 negative regulation of stress-activated MAPK cascade			Human Serum Albumin (Small molecule binding);Serum albumin iodonated (Small molecule binding)	(M3468)NABA ECM REGULATORS; (M5885)NABA MATRISOME ASSOCIATED; (M5889)NABA MATRISOME		0.0	1.0	1.0	0.0	0.0	0.0	0.0	0.0	0.0	0.0	0.0	0.0	0.0	0.0	1.0	0.0	0.0	0.0	0.0	0.0
APOA1	335	symbol	H. sapiens	335	H. sapiens	APOA1	apolipoprotein A1	GO:0010903 negative regulation of very-low-density lipoprotein particle remodeling;GO:0010901 regulation of very-low-density lipoprotein particle remodeling;GO:1902995 positive regulation of phospholipid efflux		Cytosol;Vesicles(Approved)		(M106)PID HNF3B PATHWAY	(M5948)HALLMARK BILE ACID METABOLISM; (M5946)HALLMARK COAGULATION	1.0	1.0	1.0	1.0	1.0	1.0	0.0	0.0	0.0	1.0	0.0	0.0	0.0	0.0	1.0	1.0	0.0	1.0	0.0	1.0
GC	2638	symbol	H. sapiens	2638	H. sapiens	GC	GC vitamin D binding protein	GO:0042359 vitamin D metabolic process;GO:0035461 vitamin transmembrane transport;GO:0006775 fat-soluble vitamin metabolic process					(M5948)HALLMARK BILE ACID METABOLISM	0.0	0.0	0.0	0.0	0.0	0.0	0.0	0.0	0.0	0.0	0.0	0.0	0.0	0.0	0.0	0.0	0.0	0.0	0.0	0.0
A2M	2	symbol	H. sapiens	2	H. sapiens	A2M	alpha-2-macroglobulin	GO:0001869 negative regulation of complement activation, lectin pathway;GO:0001868 regulation of complement activation, lectin pathway;GO:0045916 negative regulation of complement activation			Becaplermin (Tumor necrosis factor binding);Bacitracin (Tumor necrosis factor binding);Ocriplasmin (Tumor necrosis factor binding)	(M183)PID IL6 7 PATHWAY; (M3468)NABA ECM REGULATORS; (M5885)NABA MATRISOME ASSOCIATED	(M5897)HALLMARK IL6 JAK STAT3 SIGNALING; (M5946)HALLMARK COAGULATION	1.0	1.0	0.0	1.0	1.0	1.0	0.0	0.0	0.0	0.0	0.0	0.0	0.0	0.0	1.0	0.0	0.0	0.0	0.0	0.0
VTN	7448	symbol	H. sapiens	7448	H. sapiens	VTN	vitronectin	GO:0061302 smooth muscle cell-matrix adhesion;GO:0030949 positive regulation of vascular endothelial growth factor receptor signaling pathway;GO:0014911 positive regulation of smooth muscle cell migration		Endoplasmic reticulum;Vesicles(Supported)	Abciximab (Scavenger receptor activity)	(M212)PID INTEGRIN5 PATHWAY; (M174)PID UPA UPAR PATHWAY; (M53)PID INTEGRIN3 PATHWAY	(M5944)HALLMARK ANGIOGENESIS; (M5934)HALLMARK XENOBIOTIC METABOLISM	1.0	1.0	1.0	1.0	0.0	1.0	0.0	0.0	0.0	1.0	0.0	0.0	1.0	0.0	0.0	0.0	0.0	0.0	0.0	1.0
LUM	4060	symbol	H. sapiens	4060	H. sapiens	LUM	lumican	GO:0042340 keratan sulfate catabolic process;GO:0032914 positive regulation of transforming growth factor beta1 production;GO:0018146 keratan sulfate biosynthetic process				(M5882)NABA PROTEOGLYCANS; (M5884)NABA CORE MATRISOME; (M5889)NABA MATRISOME	(M5944)HALLMARK ANGIOGENESIS; (M5902)HALLMARK APOPTOSIS; (M5930)HALLMARK EPITHELIAL MESENCHYMAL TRANSITION	0.0	0.0	0.0	0.0	0.0	1.0	0.0	0.0	0.0	1.0	0.0	0.0	1.0	0.0	0.0	0.0	0.0	0.0	0.0	1.0
APOA4	337	symbol	H. sapiens	337	H. sapiens	APOA4	apolipoprotein A4	GO:0034445 negative regulation of plasma lipoprotein oxidation;GO:0034444 regulation of plasma lipoprotein oxidation;GO:0010873 positive regulation of cholesterol esterification		Vesicles(Approved)			(M5921)HALLMARK COMPLEMENT	0.0	0.0	1.0	0.0	0.0	1.0	0.0	0.0	0.0	0.0	0.0	0.0	0.0	0.0	0.0	0.0	0.0	0.0	0.0	0.0
KNG1	3827	symbol	H. sapiens	3827	H. sapiens	KNG1	kininogen 1	GO:0007597 blood coagulation, intrinsic pathway;GO:0042311 vasodilation;GO:0072378 blood coagulation, fibrin clot formation				(M169)PID INTEGRIN2 PATHWAY; (M240)PID SYNDECAN 2 PATHWAY; (M3468)NABA ECM REGULATORS		1.0	1.0	0.0	1.0	1.0	0.0	0.0	0.0	0.0	0.0	0.0	0.0	0.0	0.0	0.0	0.0	0.0	0.0	0.0	0.0
SOD3	6649	symbol	H. sapiens	6649	H. sapiens	SOD3	superoxide dismutase 3	GO:0019430 removal of superoxide radicals;GO:0071451 cellular response to superoxide;GO:0071450 cellular response to oxygen radical	Enzymes/ENZYME proteins/Oxidoreductases				(M5909)HALLMARK MYOGENESIS	0.0	0.0	1.0	0.0	0.0	0.0	0.0	0.0	0.0	0.0	0.0	0.0	0.0	0.0	0.0	0.0	0.0	0.0	1.0	0.0
CP	1356	symbol	H. sapiens	1356	H. sapiens	CP	ceruloplasmin	GO:0006879 cellular iron ion homeostasis;GO:0006825 copper ion transport;GO:0055072 iron ion homeostasis	Enzymes/ENZYME proteins/Oxidoreductases		Drotrecogin alfa (Ferroxidase activity)	(M255)PID HIF1 TFPATHWAY	(M5921)HALLMARK COMPLEMENT; (M5891)HALLMARK HYPOXIA	0.0	0.0	0.0	0.0	1.0	0.0	0.0	0.0	0.0	0.0	0.0	0.0	0.0	0.0	0.0	0.0	0.0	0.0	0.0	0.0
COL6A1	1291	symbol	H. sapiens	1291	H. sapiens	COL6A1	collagen type VI alpha 1 chain	GO:0003429 growth plate cartilage chondrocyte morphogenesis;GO:0003414 chondrocyte morphogenesis involved in endochondral bone morphogenesis;GO:0003422 growth plate cartilage morphogenesis		Cytosol(Approved)		(M5887)NABA BASEMENT MEMBRANES; (M3005)NABA COLLAGENS; (M198)PID SYNDECAN 1 PATHWAY	(M5947)HALLMARK IL2 STAT5 SIGNALING	0.0	0.0	0.0	0.0	0.0	1.0	0.0	0.0	0.0	1.0	0.0	0.0	0.0	0.0	0.0	0.0	0.0	0.0	0.0	0.0
HBA2	3040	symbol	H. sapiens	3040	H. sapiens	HBA2	hemoglobin subunit alpha 2	GO:0015671 oxygen transport;GO:0015701 bicarbonate transport;GO:0042744 hydrogen peroxide catabolic process	Transporters/Transporter channels and pores					0.0	0.0	1.0	0.0	0.0	0.0	0.0	0.0	0.0	0.0	0.0	0.0	0.0	0.0	0.0	0.0	0.0	0.0	0.0	0.0
ANK1	286	symbol	H. sapiens	286	H. sapiens	ANK1	ankyrin 1	GO:0045199 maintenance of epithelial cell apical/basal polarity;GO:0035090 maintenance of apical/basal cell polarity;GO:0045197 establishment or maintenance of epithelial cell apical/basal polarity	Transporters/Accessory Factors Involved in Transport				(M5945)HALLMARK HEME METABOLISM	0.0	0.0	1.0	0.0	0.0	0.0	0.0	0.0	0.0	1.0	0.0	0.0	1.0	0.0	0.0	0.0	0.0	0.0	0.0	0.0
SERPINC1	462	symbol	H. sapiens	462	H. sapiens	SERPINC1	serpin family C member 1	GO:2000266 regulation of blood coagulation, intrinsic pathway;GO:0007597 blood coagulation, intrinsic pathway;GO:0072378 blood coagulation, fibrin clot formation			Ardeparin (Serine-type endopeptidase inhibitor activity);Fondaparinux sodium (Serine-type endopeptidase inhibitor activity);Heparin (Serine-type endopeptidase inhibitor activity);Enoxaparin (Serine-type endopeptidase inhibitor activity);N-Formylmethionine (Serine-type endopeptidase inhibitor activity);SR-123781A (Serine-type endopeptidase inhibitor activity);Sulodexide (Serine-type endopeptidase …	(M33)PID GLYPICAN 1PATHWAY; (M3468)NABA ECM REGULATORS; (M5885)NABA MATRISOME ASSOCIATED	(M5946)HALLMARK COAGULATION; (M5947)HALLMARK IL2 STAT5 SIGNALING; (M5921)HALLMARK COMPLEMENT	1.0	1.0	0.0	1.0	1.0	0.0	0.0	0.0	0.0	0.0	0.0	0.0	0.0	0.0	0.0	0.0	0.0	0.0	0.0	0.0
C6	729	symbol	H. sapiens	729	H. sapiens	C6	complement C6	GO:0001970 positive regulation of activation of membrane attack complex;GO:0001969 regulation of activation of membrane attack complex;GO:0045917 positive regulation of complement activation	Transporters/Transporter channels and pores					1.0	0.0	0.0	1.0	0.0	0.0	0.0	0.0	0.0	0.0	0.0	0.0	0.0	0.0	0.0	0.0	0.0	0.0	0.0	0.0
FGB	2244	symbol	H. sapiens	2244	H. sapiens	FGB	fibrinogen beta chain	GO:0045907 positive regulation of vasoconstriction;GO:0043152 induction of bacterial agglutination;GO:0042730 fibrinolysis		Endoplasmic reticulum(Enhanced)	Sucralfate (Structural molecule activity);Alfimeprase (Structural molecule activity)	(M169)PID INTEGRIN2 PATHWAY; (M257)PID EPHRINB REV PATHWAY; (M174)PID UPA UPAR PATHWAY		1.0	1.0	1.0	1.0	1.0	1.0	0.0	0.0	0.0	1.0	1.0	1.0	0.0	0.0	0.0	0.0	0.0	0.0	0.0	0.0
A1BG	1	symbol	H. sapiens	1	H. sapiens	A1BG	alpha-1-B glycoprotein	GO:0002576 platelet degranulation;GO:0043312 neutrophil degranulation;GO:0002283 neutrophil activation involved in immune response				(M14532)ST PHOSPHOINOSITIDE 3 KINASE PATHWAY		0.0	1.0	0.0	0.0	0.0	0.0	1.0	0.0	0.0	0.0	0.0	0.0	0.0	0.0	0.0	0.0	0.0	0.0	0.0	0.0
CFB	629	symbol	H. sapiens	629	H. sapiens	CFB	complement factor B	GO:0006957 complement activation, alternative pathway;GO:0030449 regulation of complement activation;GO:2000257 regulation of protein activation cascade	Enzymes/{ENZYME proteins/Hydrolases,Peptidases/Serine-type peptidases}	Cell Junctions;Endoplasmic reticulum;Vesicles(Approved)	4-Guanidinobenzoic Acid (Serine-type endopeptidase activity);Diisopropylphosphono Group (Serine-type endopeptidase activity)	(M14775)ST G ALPHA S PATHWAY; (M16518)ST WNT CA2 CYCLIC GMP PATHWAY; (M15743)ST GA12 PATHWAY	(M5946)HALLMARK COAGULATION; (M5953)HALLMARK KRAS SIGNALING UP; (M5913)HALLMARK INTERFERON GAMMA RESPONSE	1.0	0.0	0.0	0.0	0.0	0.0	0.0	0.0	1.0	0.0	0.0	0.0	0.0	0.0	0.0	0.0	0.0	0.0	0.0	0.0
HPX	3263	symbol	H. sapiens	3263	H. sapiens	HPX	hemopexin	GO:0002925 positive regulation of humoral immune response mediated by circulating immunoglobulin;GO:0060335 positive regulation of interferon-gamma-mediated signaling pathway;GO:0002923 regulation of humoral immune response mediated by circulating immunoglobulin				(M5880)NABA ECM AFFILIATED; (M5885)NABA MATRISOME ASSOCIATED; (M5889)NABA MATRISOME		1.0	1.0	1.0	0.0	0.0	0.0	0.0	0.0	0.0	0.0	0.0	0.0	0.0	0.0	0.0	0.0	0.0	0.0	0.0	0.0
SERPINA3	12	symbol	H. sapiens	12	H. sapiens	SERPINA3	serpin family A member 3	GO:0030277 maintenance of gastrointestinal epithelium;GO:0002576 platelet degranulation;GO:0043312 neutrophil degranulation				(M3468)NABA ECM REGULATORS; (M5885)NABA MATRISOME ASSOCIATED; (M5889)NABA MATRISOME	(M5953)HALLMARK KRAS SIGNALING UP; (M5907)HALLMARK ESTROGEN RESPONSE LATE	1.0	1.0	0.0	0.0	0.0	0.0	1.0	0.0	0.0	0.0	0.0	0.0	0.0	0.0	0.0	0.0	1.0	0.0	0.0	0.0
SPTAN1	6709	symbol	H. sapiens	6709	H. sapiens	SPTAN1	spectrin alpha, non-erythrocytic 1	GO:0051693 actin filament capping;GO:0030835 negative regulation of actin filament depolymerization;GO:0030837 negative regulation of actin filament polymerization		Microtubules(Supported)Vesicles(Uncertain)		(M220)PID CASPASE PATHWAY	(M5902)HALLMARK APOPTOSIS; (M5893)HALLMARK MITOTIC SPINDLE; (M5909)HALLMARK MYOGENESIS	0.0	1.0	1.0	0.0	0.0	0.0	1.0	0.0	0.0	1.0	0.0	0.0	0.0	0.0	0.0	0.0	0.0	0.0	0.0	0.0
CFH	3075	symbol	H. sapiens	3075	H. sapiens	CFH	complement factor H	GO:0006957 complement activation, alternative pathway;GO:1903659 regulation of complement-dependent cytotoxicity;GO:0030449 regulation of complement activation		Vesicles(Approved)			(M5946)HALLMARK COAGULATION; (M5921)HALLMARK COMPLEMENT; (M5953)HALLMARK KRAS SIGNALING UP	1.0	0.0	0.0	1.0	0.0	0.0	0.0	0.0	1.0	0.0	0.0	0.0	0.0	0.0	0.0	0.0	0.0	0.0	0.0	0.0
ITIH4	3700	symbol	H. sapiens	3700	H. sapiens	ITIH4	inter-alpha-trypsin inhibitor heavy chain 4	GO:0030212 hyaluronan metabolic process;GO:0002576 platelet degranulation;GO:0006953 acute-phase response		Vesicles(Approved)		(M3468)NABA ECM REGULATORS; (M5885)NABA MATRISOME ASSOCIATED; (M5889)NABA MATRISOME	(M5934)HALLMARK XENOBIOTIC METABOLISM	1.0	1.0	0.0	0.0	0.0	0.0	1.0	0.0	0.0	0.0	0.0	0.0	1.0	0.0	0.0	0.0	0.0	0.0	0.0	0.0
C4BPA	722	symbol	H. sapiens	722	H. sapiens	C4BPA	complement component 4 binding protein alpha	GO:0045959 negative regulation of complement activation, classical pathway;GO:0030450 regulation of complement activation, classical pathway;GO:0002924 negative regulation of humoral immune response mediated by circulating immunoglobulin				(M45)PID CD40 PATHWAY		1.0	1.0	0.0	0.0	0.0	0.0	0.0	0.0	0.0	0.0	0.0	0.0	0.0	0.0	1.0	0.0	0.0	0.0	0.0	0.0
COL6A3	1293	symbol	H. sapiens	1293	H. sapiens	COL6A3	collagen type VI alpha 3 chain	GO:0003429 growth plate cartilage chondrocyte morphogenesis;GO:0003414 chondrocyte morphogenesis involved in endochondral bone morphogenesis;GO:0003422 growth plate cartilage morphogenesis				(M5887)NABA BASEMENT MEMBRANES; (M3005)NABA COLLAGENS; (M198)PID SYNDECAN 1 PATHWAY	(M5909)HALLMARK MYOGENESIS; (M5930)HALLMARK EPITHELIAL MESENCHYMAL TRANSITION	0.0	1.0	0.0	0.0	0.0	1.0	0.0	0.0	0.0	1.0	0.0	0.0	0.0	0.0	0.0	0.0	0.0	0.0	0.0	0.0
HRG	3273	symbol	H. sapiens	3273	H. sapiens	HRG	histidine rich glycoprotein	GO:0051918 negative regulation of fibrinolysis;GO:2001027 negative regulation of endothelial cell chemotaxis;GO:0051838 cytolysis by host of symbiont cells		Nucleoli fibrillar center(Uncertain)		(M3468)NABA ECM REGULATORS; (M5885)NABA MATRISOME ASSOCIATED; (M5889)NABA MATRISOME	(M5946)HALLMARK COAGULATION; (M5934)HALLMARK XENOBIOTIC METABOLISM	1.0	1.0	0.0	1.0	0.0	0.0	0.0	0.0	0.0	1.0	0.0	1.0	0.0	0.0	0.0	0.0	0.0	0.0	0.0	1.0
CLEC3B	7123	symbol	H. sapiens	7123	H. sapiens	CLEC3B	C-type lectin domain family 3 member B	GO:0010756 positive regulation of plasminogen activation;GO:0010755 regulation of plasminogen activation;GO:0010954 positive regulation of protein processing			Tenecteplase (Kringle domain binding)	(M5880)NABA ECM AFFILIATED; (M5885)NABA MATRISOME ASSOCIATED; (M5889)NABA MATRISOME		1.0	1.0	0.0	0.0	0.0	0.0	0.0	0.0	0.0	0.0	1.0	0.0	0.0	0.0	0.0	0.0	0.0	0.0	0.0	1.0
KRT5	3852	symbol	H. sapiens	3852	H. sapiens	KRT5	keratin 5	GO:0031581 hemidesmosome assembly;GO:0070268 cornification;GO:0031424 keratinization		Intermediate filaments(Supported)		(M236)PID DELTA NP63 PATHWAY; (M115)PID REG GR PATHWAY	(M5956)HALLMARK KRAS SIGNALING DN	0.0	0.0	0.0	0.0	0.0	0.0	0.0	1.0	0.0	1.0	0.0	0.0	0.0	0.0	0.0	0.0	0.0	0.0	0.0	0.0
HBB	3043	symbol	H. sapiens	3043	H. sapiens	HBB	hemoglobin subunit beta	GO:0030185 nitric oxide transport;GO:0045429 positive regulation of nitric oxide biosynthetic process;GO:0070527 platelet aggregation	Transporters/Transporter channels and pores	Vesicles(Approved)	Iron Dextran (Oxygen transporter activity);4-Carboxycinnamic Acid (Oxygen transporter activity);2-[(2-methoxy-5-methylphenoxy)methyl]pyridine (Oxygen transporter activity);4-[(5-methoxy-2-methylphenoxy)methyl]pyridine (Oxygen transporter activity);SEBACIC ACID (Oxygen transporter activity);2-[4-({[(3,5-DICHLOROPHENYL)AMINO]CARBONYL}AMINO)PHENOXY]-2-METHYLPROPANOIC ACID (Oxygen transporter activit…		(M5945)HALLMARK HEME METABOLISM	0.0	1.0	1.0	1.0	0.0	0.0	1.0	0.0	0.0	0.0	0.0	1.0	0.0	0.0	0.0	0.0	0.0	0.0	0.0	0.0
F2	2147	symbol	H. sapiens	2147	H. sapiens	F2	coagulation factor II, thrombin	GO:0070945 neutrophil mediated killing of gram-negative bacterium;GO:0051281 positive regulation of release of sequestered calcium ion into cytosol;GO:0051918 negative regulation of fibrinolysis	Enzymes/{ENZYME proteins/Hydrolases,Peptidases/Serine-type peptidases}		Lepirudin (Thrombospondin receptor activity);Bivalirudin (Thrombospondin receptor activity);Drotrecogin alfa (Thrombospondin receptor activity);Coagulation Factor IX (Recombinant) (Thrombospondin receptor activity);Menadione (Thrombospondin receptor activity);Argatroban (Thrombospondin receptor activity);Proflavine (Thrombospondin receptor activity);Beta-(2-Naphthyl)-Alanine (Thrombospondin recep…	(M138)PID THROMBIN PAR4 PATHWAY; (M15743)ST GA12 PATHWAY; (M165)PID SYNDECAN 4 PATHWAY	(M5946)HALLMARK COAGULATION; (M5902)HALLMARK APOPTOSIS; (M5921)HALLMARK COMPLEMENT	1.0	1.0	1.0	1.0	1.0	0.0	1.0	0.0	0.0	1.0	0.0	1.0	0.0	0.0	1.0	0.0	0.0	1.0	0.0	1.0
IGJ	3512	gene_synonym	H. sapiens	3512	H. sapiens	JCHAIN	joining chain of multimeric IgA and IgM	GO:0060267 positive regulation of respiratory burst;GO:0060263 regulation of respiratory burst;GO:0003094 glomerular filtration						1.0	1.0	1.0	1.0	0.0	0.0	0.0	0.0	0.0	0.0	0.0	0.0	0.0	0.0	0.0	0.0	1.0	0.0	0.0	0.0
HP	3240	symbol	H. sapiens	3240	H. sapiens	HP	haptoglobin	GO:2000296 negative regulation of hydrogen peroxide catabolic process;GO:2000295 regulation of hydrogen peroxide catabolic process;GO:0010727 negative regulation of hydrogen peroxide metabolic process	Enzymes/Peptidases/Serine-type peptidases	Vesicles(Approved)				1.0	1.0	1.0	1.0	0.0	0.0	1.0	0.0	0.0	0.0	0.0	0.0	0.0	0.0	0.0	0.0	0.0	0.0	0.0	0.0
ORM1	5004	symbol	H. sapiens	5004	H. sapiens	ORM1	orosomucoid 1	GO:0050718 positive regulation of interleukin-1 beta secretion;GO:1904469 positive regulation of tumor necrosis factor secretion;GO:0050716 positive regulation of interleukin-1 secretion		Golgi apparatus;Vesicles(Approved)	Chlorpromazine;Oxycodone;Thalidomide		(M5905)HALLMARK ADIPOGENESIS	1.0	1.0	0.0	0.0	0.0	0.0	1.0	0.0	0.0	0.0	0.0	0.0	0.0	0.0	0.0	0.0	0.0	0.0	0.0	0.0
CAT	847	symbol	H. sapiens	847	H. sapiens	CAT	catalase	GO:0033591 response to L-ascorbic acid;GO:0033197 response to vitamin E;GO:0001657 ureteric bud development	Enzymes/ENZYME proteins/Oxidoreductases	Cytosol;Vesicles(Supported)	Fomepizole (Receptor binding)	(M136)PID FOXO PATHWAY	(M5938)HALLMARK REACTIVE OXIGEN SPECIES PATHWAY; (M5949)HALLMARK PEROXISOME; (M5948)HALLMARK BILE ACID METABOLISM	0.0	1.0	1.0	0.0	0.0	0.0	1.0	0.0	0.0	0.0	0.0	0.0	0.0	1.0	0.0	0.0	0.0	0.0	1.0	1.0
ALDH1A1	216	symbol	H. sapiens	216	H. sapiens	ALDH1A1	aldehyde dehydrogenase 1 family member A1	GO:0061624 fructose catabolic process to hydroxyacetone phosphate and glyceraldehyde-3-phosphate;GO:0006001 fructose catabolic process;GO:0006069 ethanol oxidation	Enzymes/ENZYME proteins/Oxidoreductases	Cytosol(Enhanced)	NADH (Retinal dehydrogenase activity);Vitamin A (Retinal dehydrogenase activity);Tretinoin (Retinal dehydrogenase activity);1,4-Dithiothreitol (Retinal dehydrogenase activity)		(M5949)HALLMARK PEROXISOME; (M5948)HALLMARK BILE ACID METABOLISM; (M5935)HALLMARK FATTY ACID METABOLISM	0.0	0.0	1.0	0.0	0.0	0.0	0.0	0.0	0.0	0.0	0.0	0.0	1.0	1.0	0.0	0.0	1.0	0.0	0.0	0.0
SPTBN1	6711	symbol	H. sapiens	6711	H. sapiens	SPTBN1	spectrin beta, non-erythrocytic 1	GO:1900042 positive regulation of interleukin-2 secretion;GO:1900040 regulation of interleukin-2 secretion;GO:0051693 actin filament capping		Golgi apparatus(Approved)	Calcium (Structural constituent of cytoskeleton);D-Myo-Inositol-1,4,5-Triphosphate (Structural constituent of cytoskeleton)	(M286)PID TGFBR PATHWAY	(M5896)HALLMARK TGF BETA SIGNALING; (M5893)HALLMARK MITOTIC SPINDLE	0.0	0.0	1.0	0.0	0.0	0.0	0.0	0.0	0.0	1.0	0.0	0.0	0.0	0.0	0.0	0.0	0.0	0.0	0.0	0.0
PRELP	5549	symbol	H. sapiens	5549	H. sapiens	PRELP	proline and arginine rich end leucine rich repeat protein	GO:0042340 keratan sulfate catabolic process;GO:0018146 keratan sulfate biosynthetic process;GO:0042339 keratan sulfate metabolic process				(M5882)NABA PROTEOGLYCANS; (M5884)NABA CORE MATRISOME; (M5889)NABA MATRISOME		0.0	0.0	0.0	0.0	0.0	1.0	0.0	0.0	0.0	0.0	0.0	0.0	1.0	0.0	0.0	0.0	0.0	0.0	1.0	0.0
PLG	5340	symbol	H. sapiens	5340	H. sapiens	PLG	plasminogen	GO:0051919 positive regulation of fibrinolysis;GO:0051918 negative regulation of fibrinolysis;GO:0051917 regulation of fibrinolysis	Enzymes/{ENZYME proteins/Hydrolases,Peptidases/Serine-type peptidases}	Vesicles(Uncertain)	Alteplase (Serine-type peptidase activity);Urokinase (Serine-type peptidase activity);Reteplase (Serine-type peptidase activity);Anistreplase (Serine-type peptidase activity);Tenecteplase (Serine-type peptidase activity);Streptokinase (Serine-type peptidase activity);Tranexamic Acid (Serine-type peptidase activity);Aminocaproic Acid (Serine-type peptidase activity);Bicine (Serine-type peptidase a…	(M165)PID SYNDECAN 4 PATHWAY; (M159)PID AMB2 NEUTROPHILS PATHWAY; (M174)PID UPA UPAR PATHWAY	(M5919)HALLMARK HEDGEHOG SIGNALING; (M5946)HALLMARK COAGULATION; (M5921)HALLMARK COMPLEMENT	1.0	1.0	0.0	1.0	1.0	1.0	0.0	0.0	1.0	0.0	0.0	0.0	0.0	0.0	0.0	0.0	1.0	0.0	0.0	0.0
AOC3	8639	symbol	H. sapiens	8639	H. sapiens	AOC3	amine oxidase copper containing 3	GO:1902283 negative regulation of primary amine oxidase activity;GO:0051354 negative regulation of oxidoreductase activity;GO:0006805 xenobiotic metabolic process	Enzymes/ENZYME proteins/Oxidoreductases	Cytosol;Golgi apparatus(Approved)	Phenelzine (Tryptamine:oxygen oxidoreductase (deaminating) activity);Hydralazine (Tryptamine:oxygen oxidoreductase (deaminating) activity);6-hydroxydopa quinone (Tryptamine:oxygen oxidoreductase (deaminating) activity)		(M5935)HALLMARK FATTY ACID METABOLISM	0.0	0.0	1.0	0.0	0.0	0.0	0.0	0.0	0.0	0.0	0.0	0.0	0.0	0.0	0.0	0.0	0.0	0.0	0.0	0.0
C9	735	symbol	H. sapiens	735	H. sapiens	C9	complement C9	GO:0006957 complement activation, alternative pathway;GO:0006958 complement activation, classical pathway;GO:0030449 regulation of complement activation		Cytosol;Plasma membrane(Uncertain)			(M5946)HALLMARK COAGULATION; (M5921)HALLMARK COMPLEMENT	1.0	0.0	0.0	1.0	0.0	0.0	0.0	0.0	1.0	0.0	0.0	0.0	0.0	0.0	0.0	0.0	0.0	0.0	0.0	0.0
PLIN1	5346	symbol	H. sapiens	5346	H. sapiens	PLIN1	perilipin 1	GO:0016042 lipid catabolic process;GO:0006629 lipid metabolic process;GO:1901575 organic substance catabolic process		Peroxisomes(Uncertain)				0.0	0.0	0.0	0.0	0.0	0.0	0.0	0.0	0.0	0.0	0.0	0.0	0.0	0.0	0.0	1.0	0.0	0.0	0.0	0.0
FHL1	2273	symbol	H. sapiens	2273	H. sapiens	FHL1	four and a half LIM domains 1	GO:1901016 regulation of potassium ion transmembrane transporter activity;GO:0043268 positive regulation of potassium ion transport;GO:1901379 regulation of potassium ion transmembrane transport		Cytosol(Supported)Plasma membrane(Approved)			(M5909)HALLMARK MYOGENESIS	0.0	0.0	0.0	0.0	0.0	0.0	0.0	0.0	0.0	0.0	0.0	0.0	0.0	0.0	0.0	0.0	0.0	1.0	0.0	0.0
TNXB	7148	symbol	H. sapiens	7148	H. sapiens	TNXB	tenascin XB	GO:0048251 elastic fiber assembly;GO:0085029 extracellular matrix assembly;GO:0030199 collagen fibril organization				(M3008)NABA ECM GLYCOPROTEINS; (M5884)NABA CORE MATRISOME; (M5889)NABA MATRISOME		0.0	0.0	0.0	0.0	0.0	1.0	0.0	0.0	0.0	1.0	0.0	0.0	0.0	0.0	0.0	0.0	0.0	0.0	0.0	0.0
SERPIND1	3053	symbol	H. sapiens	3053	H. sapiens	SERPIND1	serpin family D member 1	GO:0010951 negative regulation of endopeptidase activity;GO:0010466 negative regulation of peptidase activity;GO:0007596 blood coagulation		Vesicles(Approved)	Ardeparin (Serine-type endopeptidase inhibitor activity);Sulodexide (Serine-type endopeptidase inhibitor activity)	(M3468)NABA ECM REGULATORS; (M5885)NABA MATRISOME ASSOCIATED; (M5889)NABA MATRISOME		1.0	1.0	0.0	1.0	1.0	0.0	0.0	0.0	0.0	0.0	0.0	0.0	0.0	0.0	0.0	0.0	0.0	0.0	0.0	0.0
SERPINA6	866	symbol	H. sapiens	866	H. sapiens	SERPINA6	serpin family A member 6	GO:0008211 glucocorticoid metabolic process;GO:0010951 negative regulation of endopeptidase activity;GO:0010466 negative regulation of peptidase activity				(M3468)NABA ECM REGULATORS; (M5885)NABA MATRISOME ASSOCIATED; (M5889)NABA MATRISOME	(M5949)HALLMARK PEROXISOME; (M5948)HALLMARK BILE ACID METABOLISM; (M5934)HALLMARK XENOBIOTIC METABOLISM	0.0	1.0	0.0	0.0	0.0	0.0	0.0	0.0	0.0	0.0	0.0	0.0	0.0	0.0	0.0	0.0	0.0	0.0	0.0	0.0
SERPINA4	5267	symbol	H. sapiens	5267	H. sapiens	SERPINA4	serpin family A member 4	GO:0002576 platelet degranulation;GO:0010951 negative regulation of endopeptidase activity;GO:0010466 negative regulation of peptidase activity				(M9378)ST INTERLEUKIN 4 PATHWAY; (M12645)ST GA13 PATHWAY; (M3501)ST B CELL ANTIGEN RECEPTOR		0.0	1.0	0.0	0.0	0.0	0.0	0.0	0.0	0.0	0.0	0.0	0.0	0.0	0.0	0.0	0.0	0.0	0.0	0.0	0.0
CSRP1	1465	symbol	H. sapiens	1465	H. sapiens	CSRP1	cysteine and glycine rich protein 1	GO:0070527 platelet aggregation;GO:0045214 sarcomere organization;GO:0030239 myofibril assembly					(M5946)HALLMARK COAGULATION; (M5921)HALLMARK COMPLEMENT	0.0	0.0	0.0	1.0	0.0	0.0	0.0	0.0	0.0	1.0	0.0	1.0	0.0	0.0	0.0	0.0	0.0	0.0	0.0	0.0
LMNA	4000	symbol	H. sapiens	4000	H. sapiens	LMNA	lamin A/C	GO:1900114 positive regulation of histone H3-K9 trimethylation;GO:1903243 negative regulation of cardiac muscle hypertrophy in response to stress;GO:1900112 regulation of histone H3-K9 trimethylation				(M220)PID CASPASE PATHWAY	(M5902)HALLMARK APOPTOSIS	0.0	0.0	0.0	0.0	0.0	0.0	0.0	0.0	0.0	0.0	0.0	0.0	0.0	0.0	0.0	0.0	0.0	1.0	1.0	0.0
PLIN4	729359	symbol	H. sapiens	729359	H. sapiens	PLIN4	perilipin 4			Cytosol;Lipid droplets;Plasma membrane(Supported)Vesicles(Approved)				0.0	0.0	0.0	0.0	0.0	0.0	0.0	0.0	0.0	0.0	0.0	0.0	0.0	0.0	0.0	1.0	0.0	0.0	0.0	0.0

## Sheet: Enrichment
GroupID	Category	Term	Description	LogP	Log(q-value)	InTerm_InList	Genes	Symbols
1_Summary	KEGG Pathway	hsa04610	Complement and coagulation cascades	-19.7	-15.3809	13/79	2,462,629,722,729,735,2147,2244,3053,3075,3827,5340,7448,12,3240,3700,5004,3848,2597,3263,3273,3512,5230,7123,7466,335	A2M,SERPINC1,CFB,C4BPA,C6,C9,F2,FGB,SERPIND1,CFH,KNG1,PLG,VTN,SERPINA3,HP,ITIH4,ORM1,KRT1,GAPDH,HPX,HRG,JCHAIN,PGK1,CLEC3B,WFS1,APOA1
1_Member	KEGG Pathway	hsa04610	Complement and coagulation cascades	-19.7	-15.3809	13/79	2,462,629,722,729,735,2147,2244,3053,3075,3827,5340,7448	A2M,SERPINC1,CFB,C4BPA,C6,C9,F2,FGB,SERPIND1,CFH,KNG1,PLG,VTN
1_Member	GO Biological Processes	GO:0002526	acute inflammatory response	-13.6911	-10.1502	13/222	2,12,462,629,722,729,735,2147,3075,3240,3700,5004,7448	A2M,SERPINA3,SERPINC1,CFB,C4BPA,C6,C9,F2,CFH,HP,ITIH4,ORM1,VTN
1_Member	GO Biological Processes	GO:0072376	protein activation cascade	-12.7495	-9.42573	12/201	2,462,629,722,729,735,2147,2244,3075,3827,3848,7448	A2M,SERPINC1,CFB,C4BPA,C6,C9,F2,FGB,CFH,KNG1,KRT1,VTN
1_Member	GO Biological Processes	GO:0006959	humoral immune response	-12.2797	-9.07449	14/361	2,629,722,729,735,2147,2244,2597,3075,3263,3273,3512,3848,7448	A2M,CFB,C4BPA,C6,C9,F2,FGB,GAPDH,CFH,HPX,HRG,JCHAIN,KRT1,VTN
1_Member	GO Biological Processes	GO:2000257	regulation of protein activation cascade	-10.6263	-7.56242	9/117	2,462,629,722,729,735,2147,3075,7448	A2M,SERPINC1,CFB,C4BPA,C6,C9,F2,CFH,VTN
1_Member	Reactome Gene Sets	R-HSA-977606	Regulation of Complement cascade	-10.4225	-7.42556	7/47	629,722,729,735,2147,3075,7448	CFB,C4BPA,C6,C9,F2,CFH,VTN
1_Member	GO Biological Processes	GO:0002920	regulation of humoral immune response	-10.0643	-7.19652	9/135	2,629,722,729,735,2147,3075,3263,7448	A2M,CFB,C4BPA,C6,C9,F2,CFH,HPX,VTN
1_Member	Reactome Gene Sets	R-HSA-166658	Complement cascade	-9.75282	-6.92508	7/58	629,722,729,735,2147,3075,7448	CFB,C4BPA,C6,C9,F2,CFH,VTN
1_Member	GO Biological Processes	GO:0051604	protein maturation	-9.31298	-6.52536	12/396	2,629,722,729,735,2147,2244,3075,5230,7123,7448,7466	A2M,CFB,C4BPA,C6,C9,F2,FGB,CFH,PGK1,CLEC3B,VTN,WFS1
1_Member	GO Biological Processes	GO:0030449	regulation of complement activation	-9.10601	-6.35511	8/116	2,629,722,729,735,2147,3075,7448	A2M,CFB,C4BPA,C6,C9,F2,CFH,VTN
1_Member	GO Biological Processes	GO:0016485	protein processing	-9.03222	-6.30418	11/327	2,629,722,729,735,2147,2244,3075,5230,7123,7448	A2M,CFB,C4BPA,C6,C9,F2,FGB,CFH,PGK1,CLEC3B,VTN
1_Member	GO Biological Processes	GO:0006956	complement activation	-8.99291	-6.2838	9/178	2,629,722,729,735,2147,3075,3848,7448	A2M,CFB,C4BPA,C6,C9,F2,CFH,KRT1,VTN
1_Member	GO Biological Processes	GO:0070613	regulation of protein processing	-8.95002	-6.25416	9/180	2,629,722,729,735,2147,3075,7123,7448	A2M,CFB,C4BPA,C6,C9,F2,CFH,CLEC3B,VTN
1_Member	GO Biological Processes	GO:1903317	regulation of protein maturation	-8.90763	-6.22199	9/182	2,629,722,729,735,2147,3075,7123,7448	A2M,CFB,C4BPA,C6,C9,F2,CFH,CLEC3B,VTN
1_Member	GO Biological Processes	GO:0002673	regulation of acute inflammatory response	-7.97702	-5.39563	8/161	2,629,722,729,735,2147,3075,7448	A2M,CFB,C4BPA,C6,C9,F2,CFH,VTN
1_Member	GO Biological Processes	GO:0002697	regulation of immune effector process	-6.41235	-3.92576	10/466	2,335,629,722,729,735,2147,3075,3263,7448	A2M,APOA1,CFB,C4BPA,C6,C9,F2,CFH,HPX,VTN
1_Member	GO Biological Processes	GO:0050727	regulation of inflammatory response	-6.07153	-3.60976	10/508	2,335,629,722,729,735,2147,3075,3848,7448	A2M,APOA1,CFB,C4BPA,C6,C9,F2,CFH,KRT1,VTN
1_Member	GO Biological Processes	GO:0002253	activation of immune response	-4.67852	-2.31366	10/731	2,629,722,729,735,2147,2244,3075,3848,7448	A2M,CFB,C4BPA,C6,C9,F2,FGB,CFH,KRT1,VTN
1_Member	GO Biological Processes	GO:0002455	humoral immune response mediated by circulating immunoglobulin	-3.12503	-0.97148	4/154	722,729,735,3263	C4BPA,C6,C9,HPX
1_Member	GO Biological Processes	GO:0016064	immunoglobulin mediated immune response	-2.52172	-0.474454	4/225	722,729,735,3263	C4BPA,C6,C9,HPX
1_Member	GO Biological Processes	GO:0019724	B cell mediated immunity	-2.50112	-0.463043	4/228	722,729,735,3263	C4BPA,C6,C9,HPX
1_Member	GO Biological Processes	GO:0006958	complement activation, classical pathway	-2.20378	-0.223995	3/141	722,729,735	C4BPA,C6,C9
2_Summary	GO Biological Processes	GO:0002576	platelet degranulation	-15.1235	-11.2592	12/128	1,2,12,335,2244,3273,3700,3827,5004,5267,5340,7123,259,462,722,866,1293,2147,2597,3053,7448,3043,3512,847,3240,3848,6709,3263	A1BG,A2M,SERPINA3,APOA1,FGB,HRG,ITIH4,KNG1,ORM1,SERPINA4,PLG,CLEC3B,AMBP,SERPINC1,C4BPA,SERPINA6,COL6A3,F2,GAPDH,SERPIND1,VTN,HBB,JCHAIN,CAT,HP,KRT1,SPTAN1,HPX
2_Member	GO Biological Processes	GO:0002576	platelet degranulation	-15.1235	-11.2592	12/128	1,2,12,335,2244,3273,3700,3827,5004,5267,5340,7123	A1BG,A2M,SERPINA3,APOA1,FGB,HRG,ITIH4,KNG1,ORM1,SERPINA4,PLG,CLEC3B
2_Member	Reactome Gene Sets	R-HSA-114608	Platelet degranulation	-15.082	-11.2592	12/129	1,2,12,335,2244,3273,3700,3827,5004,5267,5340,7123	A1BG,A2M,SERPINA3,APOA1,FGB,HRG,ITIH4,KNG1,ORM1,SERPINA4,PLG,CLEC3B
2_Member	Reactome Gene Sets	R-HSA-76005	Response to elevated platelet cytosolic Ca2+	-14.8793	-11.2592	12/134	1,2,12,335,2244,3273,3700,3827,5004,5267,5340,7123	A1BG,A2M,SERPINA3,APOA1,FGB,HRG,ITIH4,KNG1,ORM1,SERPINA4,PLG,CLEC3B
2_Member	GO Biological Processes	GO:0045861	negative regulation of proteolysis	-13.4722	-9.99815	15/368	2,12,259,462,722,866,1293,2147,2597,3053,3273,3700,3827,5267,7448	A2M,SERPINA3,AMBP,SERPINC1,C4BPA,SERPINA6,COL6A3,F2,GAPDH,SERPIND1,HRG,ITIH4,KNG1,SERPINA4,VTN
2_Member	GO Biological Processes	GO:0010951	negative regulation of endopeptidase activity	-12.9604	-9.54435	13/253	2,12,259,462,866,1293,2597,3053,3273,3700,3827,5267,7448	A2M,SERPINA3,AMBP,SERPINC1,SERPINA6,COL6A3,GAPDH,SERPIND1,HRG,ITIH4,KNG1,SERPINA4,VTN
2_Member	Reactome Gene Sets	R-HSA-76002	Platelet activation, signaling and aggregation	-12.7448	-9.42573	13/263	1,2,12,335,2147,2244,3273,3700,3827,5004,5267,5340,7123	A1BG,A2M,SERPINA3,APOA1,F2,FGB,HRG,ITIH4,KNG1,ORM1,SERPINA4,PLG,CLEC3B
2_Member	GO Biological Processes	GO:0010466	negative regulation of peptidase activity	-12.6819	-9.40416	13/266	2,12,259,462,866,1293,2597,3053,3273,3700,3827,5267,7448	A2M,SERPINA3,AMBP,SERPINC1,SERPINA6,COL6A3,GAPDH,SERPIND1,HRG,ITIH4,KNG1,SERPINA4,VTN
2_Member	Reactome Gene Sets	R-HSA-109582	Hemostasis	-12.4592	-9.21928	17/622	1,2,12,335,462,2147,2244,3043,3053,3273,3512,3700,3827,5004,5267,5340,7123	A1BG,A2M,SERPINA3,APOA1,SERPINC1,F2,FGB,HBB,SERPIND1,HRG,JCHAIN,ITIH4,KNG1,ORM1,SERPINA4,PLG,CLEC3B
2_Member	Canonical Pathways	M3468	NABA ECM REGULATORS	-11.8781	-8.70511	12/238	2,12,259,462,866,2147,3053,3273,3700,3827,5267,5340	A2M,SERPINA3,AMBP,SERPINC1,SERPINA6,F2,SERPIND1,HRG,ITIH4,KNG1,SERPINA4,PLG
2_Member	GO Biological Processes	GO:0045055	regulated exocytosis	-10.7594	-7.65346	17/796	1,2,12,335,847,2244,3043,3240,3273,3700,3827,3848,5004,5267,5340,6709,7123	A1BG,A2M,SERPINA3,APOA1,CAT,FGB,HBB,HP,HRG,ITIH4,KNG1,KRT1,ORM1,SERPINA4,PLG,SPTAN1,CLEC3B
2_Member	GO Biological Processes	GO:0051346	negative regulation of hydrolase activity	-10.7421	-7.65346	14/470	2,12,259,335,462,866,1293,2597,3053,3273,3700,3827,5267,7448	A2M,SERPINA3,AMBP,APOA1,SERPINC1,SERPINA6,COL6A3,GAPDH,SERPIND1,HRG,ITIH4,KNG1,SERPINA4,VTN
2_Member	GO Biological Processes	GO:0052548	regulation of endopeptidase activity	-10.074	-7.19652	13/429	2,12,259,462,866,1293,2597,3053,3273,3700,3827,5267,7448	A2M,SERPINA3,AMBP,SERPINC1,SERPINA6,COL6A3,GAPDH,SERPIND1,HRG,ITIH4,KNG1,SERPINA4,VTN
2_Member	GO Biological Processes	GO:0052547	regulation of peptidase activity	-9.70147	-6.88752	13/460	2,12,259,462,866,1293,2597,3053,3273,3700,3827,5267,7448	A2M,SERPINA3,AMBP,SERPINC1,SERPINA6,COL6A3,GAPDH,SERPIND1,HRG,ITIH4,KNG1,SERPINA4,VTN
2_Member	Canonical Pathways	M5885	NABA MATRISOME ASSOCIATED	-8.08631	-5.47477	14/753	2,12,259,462,866,2147,3053,3263,3273,3700,3827,5267,5340,7123	A2M,SERPINA3,AMBP,SERPINC1,SERPINA6,F2,SERPIND1,HPX,HRG,ITIH4,KNG1,SERPINA4,PLG,CLEC3B
3_Summary	Reactome Gene Sets	R-HSA-2168880	Scavenging of heme from plasma	-14.956	-11.2592	7/13	259,335,3040,3043,3240,3263,3512,337,847,23530,6649,2597,3313,5230,10135,216,2147,7448,286,6709,6711,3848,2244,8639	AMBP,APOA1,HBA2,HBB,HP,HPX,JCHAIN,APOA4,CAT,NNT,SOD3,GAPDH,HSPA9,PGK1,NAMPT,ALDH1A1,F2,VTN,ANK1,SPTAN1,SPTBN1,KRT1,FGB,AOC3
3_Member	Reactome Gene Sets	R-HSA-2168880	Scavenging of heme from plasma	-14.956	-11.2592	7/13	259,335,3040,3043,3240,3263,3512	AMBP,APOA1,HBA2,HBB,HP,HPX,JCHAIN
3_Member	Reactome Gene Sets	R-HSA-2173782	Binding and Uptake of Ligands by Scavenger Receptors	-10.7855	-7.65346	7/42	259,335,3040,3043,3240,3263,3512	AMBP,APOA1,HBA2,HBB,HP,HPX,JCHAIN
3_Member	GO Biological Processes	GO:0042744	hydrogen peroxide catabolic process	-9.54543	-6.74483	6/33	337,847,3040,3043,3240,23530	APOA4,CAT,HBA2,HBB,HP,NNT
3_Member	GO Biological Processes	GO:0051187	cofactor catabolic process	-9.25338	-6.47834	7/68	259,337,847,3040,3043,3240,23530	AMBP,APOA4,CAT,HBA2,HBB,HP,NNT
3_Member	GO Biological Processes	GO:0042743	hydrogen peroxide metabolic process	-8.00497	-5.41014	6/58	337,847,3040,3043,3240,23530	APOA4,CAT,HBA2,HBB,HP,NNT
3_Member	GO Biological Processes	GO:0098869	cellular oxidant detoxification	-7.97437	-5.39563	7/103	337,847,3040,3043,3240,6649,23530	APOA4,CAT,HBA2,HBB,HP,SOD3,NNT
3_Member	GO Biological Processes	GO:0017001	antibiotic catabolic process	-7.91443	-5.34351	6/60	337,847,3040,3043,3240,23530	APOA4,CAT,HBA2,HBB,HP,NNT
3_Member	GO Biological Processes	GO:1990748	cellular detoxification	-7.66688	-5.1112	7/114	337,847,3040,3043,3240,6649,23530	APOA4,CAT,HBA2,HBB,HP,SOD3,NNT
3_Member	GO Biological Processes	GO:0051186	cofactor metabolic process	-7.23062	-4.69684	12/609	259,337,847,2597,3040,3043,3240,3263,3313,5230,10135,23530	AMBP,APOA4,CAT,GAPDH,HBA2,HBB,HP,HPX,HSPA9,PGK1,NAMPT,NNT
3_Member	GO Biological Processes	GO:0098754	detoxification	-7.20347	-4.67675	7/133	337,847,3040,3043,3240,6649,23530	APOA4,CAT,HBA2,HBB,HP,SOD3,NNT
3_Member	GO Biological Processes	GO:0016999	antibiotic metabolic process	-6.80575	-4.30534	7/152	216,337,847,3040,3043,3240,23530	ALDH1A1,APOA4,CAT,HBA2,HBB,HP,NNT
3_Member	GO Biological Processes	GO:0072593	reactive oxygen species metabolic process	-6.05913	-3.60838	8/286	337,847,2147,3040,3043,3240,6649,23530	APOA4,CAT,F2,HBA2,HBB,HP,SOD3,NNT
3_Member	GO Biological Processes	GO:0006898	receptor-mediated endocytosis	-5.6251	-3.19758	8/327	259,335,3040,3043,3240,3263,3512,7448	AMBP,APOA1,HBA2,HBB,HP,HPX,JCHAIN,VTN
3_Member	GO Biological Processes	GO:0042737	drug catabolic process	-5.6246	-3.19758	6/145	337,847,3040,3043,3240,23530	APOA4,CAT,HBA2,HBB,HP,NNT
3_Member	GO Biological Processes	GO:0097237	cellular response to toxic substance	-5.34564	-2.92963	7/251	337,847,3040,3043,3240,6649,23530	APOA4,CAT,HBA2,HBB,HP,SOD3,NNT
3_Member	Reactome Gene Sets	R-HSA-5653656	Vesicle-mediated transport	-4.98794	-2.59825	10/673	259,286,335,3040,3043,3240,3263,3512,6709,6711	AMBP,ANK1,APOA1,HBA2,HBB,HP,HPX,JCHAIN,SPTAN1,SPTBN1
3_Member	GO Biological Processes	GO:0000302	response to reactive oxygen species	-4.41895	-2.08927	6/236	337,847,3040,3043,3240,6649	APOA4,CAT,HBA2,HBB,HP,SOD3
3_Member	KEGG Pathway	hsa05143	African trypanosomiasis	-3.96151	-1.72159	3/35	335,3040,3043	APOA1,HBA2,HBB
3_Member	GO Biological Processes	GO:0006979	response to oxidative stress	-3.68658	-1.4609	7/458	337,847,3040,3043,3240,3848,6649	APOA4,CAT,HBA2,HBB,HP,KRT1,SOD3
3_Member	GO Biological Processes	GO:0009636	response to toxic substance	-3.29006	-1.10449	7/533	337,847,3040,3043,3240,6649,23530	APOA4,CAT,HBA2,HBB,HP,SOD3,NNT
3_Member	GO Biological Processes	GO:0042542	response to hydrogen peroxide	-3.21179	-1.0419	4/146	847,3040,3043,3240	CAT,HBA2,HBB,HP
3_Member	GO Biological Processes	GO:0010035	response to inorganic substance	-3.14507	-0.984324	7/564	337,847,2244,3040,3043,3240,6649	APOA4,CAT,FGB,HBA2,HBB,HP,SOD3
3_Member	GO Biological Processes	GO:0046677	response to antibiotic	-2.73406	-0.637667	5/331	847,3040,3043,3240,8639	CAT,HBA2,HBB,HP,AOC3
3_Member	GO Biological Processes	GO:2000377	regulation of reactive oxygen species metabolic process	-2.73032	-0.637123	4/197	2147,3043,3240,23530	F2,HBB,HP,NNT
3_Member	GO Biological Processes	GO:2000379	positive regulation of reactive oxygen species metabolic process	-2.58545	-0.521618	3/103	2147,3043,23530	F2,HBB,NNT
4_Summary	GO Biological Processes	GO:0030193	regulation of blood coagulation	-10.5509	-7.51057	8/77	462,2147,2244,3273,3827,3848,5340,7448,2,1465,3043,3053,7466,335,1634,729,735,2597,3512,3075,3240	SERPINC1,F2,FGB,HRG,KNG1,KRT1,PLG,VTN,A2M,CSRP1,HBB,SERPIND1,WFS1,APOA1,DCN,C6,C9,GAPDH,JCHAIN,CFH,HP
4_Member	GO Biological Processes	GO:0030193	regulation of blood coagulation	-10.5509	-7.51057	8/77	462,2147,2244,3273,3827,3848,5340,7448	SERPINC1,F2,FGB,HRG,KNG1,KRT1,PLG,VTN
4_Member	GO Biological Processes	GO:1900046	regulation of hemostasis	-10.5048	-7.48674	8/78	462,2147,2244,3273,3827,3848,5340,7448	SERPINC1,F2,FGB,HRG,KNG1,KRT1,PLG,VTN
4_Member	GO Biological Processes	GO:0050818	regulation of coagulation	-10.3265	-7.34985	8/82	462,2147,2244,3273,3827,3848,5340,7448	SERPINC1,F2,FGB,HRG,KNG1,KRT1,PLG,VTN
4_Member	GO Biological Processes	GO:0030195	negative regulation of blood coagulation	-10.2888	-7.33146	7/49	2147,2244,3273,3827,3848,5340,7448	F2,FGB,HRG,KNG1,KRT1,PLG,VTN
4_Member	GO Biological Processes	GO:1900047	negative regulation of hemostasis	-10.2242	-7.28534	7/50	2147,2244,3273,3827,3848,5340,7448	F2,FGB,HRG,KNG1,KRT1,PLG,VTN
4_Member	GO Biological Processes	GO:0007596	blood coagulation	-10.1301	-7.20896	12/336	2,462,1465,2147,2244,3043,3053,3273,3827,3848,5340,7448	A2M,SERPINC1,CSRP1,F2,FGB,HBB,SERPIND1,HRG,KNG1,KRT1,PLG,VTN
4_Member	GO Biological Processes	GO:0007599	hemostasis	-10.0562	-7.19652	12/341	2,462,1465,2147,2244,3043,3053,3273,3827,3848,5340,7448	A2M,SERPINC1,CSRP1,F2,FGB,HBB,SERPIND1,HRG,KNG1,KRT1,PLG,VTN
4_Member	GO Biological Processes	GO:0050817	coagulation	-10.0416	-7.19652	12/342	2,462,1465,2147,2244,3043,3053,3273,3827,3848,5340,7448	A2M,SERPINC1,CSRP1,F2,FGB,HBB,SERPIND1,HRG,KNG1,KRT1,PLG,VTN
4_Member	GO Biological Processes	GO:0050819	negative regulation of coagulation	-10.0385	-7.19652	7/53	2147,2244,3273,3827,3848,5340,7448	F2,FGB,HRG,KNG1,KRT1,PLG,VTN
4_Member	GO Biological Processes	GO:0050878	regulation of body fluid levels	-9.18588	-6.42308	13/507	2,462,1465,2147,2244,3043,3053,3273,3827,3848,5340,7448,7466	A2M,SERPINC1,CSRP1,F2,FGB,HBB,SERPIND1,HRG,KNG1,KRT1,PLG,VTN,WFS1
4_Member	GO Biological Processes	GO:0061045	negative regulation of wound healing	-8.99012	-6.2838	7/74	2147,2244,3273,3827,3848,5340,7448	F2,FGB,HRG,KNG1,KRT1,PLG,VTN
4_Member	GO Biological Processes	GO:0009611	response to wounding	-8.56031	-5.89442	14/691	2,335,462,1465,1634,2147,2244,3043,3053,3273,3827,3848,5340,7448	A2M,APOA1,SERPINC1,CSRP1,DCN,F2,FGB,HBB,SERPIND1,HRG,KNG1,KRT1,PLG,VTN
4_Member	GO Biological Processes	GO:0042060	wound healing	-8.51707	-5.86073	13/576	2,462,1465,1634,2147,2244,3043,3053,3273,3827,3848,5340,7448	A2M,SERPINC1,CSRP1,DCN,F2,FGB,HBB,SERPIND1,HRG,KNG1,KRT1,PLG,VTN
4_Member	GO Biological Processes	GO:1903035	negative regulation of response to wounding	-8.42052	-5.78266	7/89	2147,2244,3273,3827,3848,5340,7448	F2,FGB,HRG,KNG1,KRT1,PLG,VTN
4_Member	GO Biological Processes	GO:0042730	fibrinolysis	-8.24591	-5.617	5/25	2147,2244,3273,3848,5340	F2,FGB,HRG,KRT1,PLG
4_Member	GO Biological Processes	GO:0061041	regulation of wound healing	-8.12872	-5.50859	8/154	462,2147,2244,3273,3827,3848,5340,7448	SERPINC1,F2,FGB,HRG,KNG1,KRT1,PLG,VTN
4_Member	GO Biological Processes	GO:1903034	regulation of response to wounding	-7.48751	-4.93926	8/186	462,2147,2244,3273,3827,3848,5340,7448	SERPINC1,F2,FGB,HRG,KNG1,KRT1,PLG,VTN
4_Member	GO Biological Processes	GO:0019835	cytolysis	-6.05825	-3.60838	4/28	729,735,2147,3273	C6,C9,F2,HRG
4_Member	GO Biological Processes	GO:0051918	negative regulation of fibrinolysis	-5.67769	-3.2394	3/10	2147,3273,5340	F2,HRG,PLG
4_Member	GO Biological Processes	GO:0051917	regulation of fibrinolysis	-5.19906	-2.78844	3/14	2147,3273,5340	F2,HRG,PLG
4_Member	GO Biological Processes	GO:0032102	negative regulation of response to external stimulus	-5.17912	-2.77383	8/376	335,2147,2244,3273,3827,3848,5340,7448	APOA1,F2,FGB,HRG,KNG1,KRT1,PLG,VTN
4_Member	GO Biological Processes	GO:0019730	antimicrobial humoral response	-4.72324	-2.35353	5/123	2147,2244,2597,3273,3512	F2,FGB,GAPDH,HRG,JCHAIN
4_Member	GO Biological Processes	GO:0090303	positive regulation of wound healing	-4.46805	-2.12667	4/69	2147,3273,5340,7448	F2,HRG,PLG,VTN
4_Member	GO Biological Processes	GO:0051852	disruption by host of symbiont cells	-4.35505	-2.04027	3/26	2147,2597,3273	F2,GAPDH,HRG
4_Member	GO Biological Processes	GO:0051873	killing by host of symbiont cells	-4.35505	-2.04027	3/26	2147,2597,3273	F2,GAPDH,HRG
4_Member	GO Biological Processes	GO:0030194	positive regulation of blood coagulation	-4.30472	-2.00265	3/27	2147,3273,5340	F2,HRG,PLG
4_Member	GO Biological Processes	GO:1900048	positive regulation of hemostasis	-4.30472	-2.00265	3/27	2147,3273,5340	F2,HRG,PLG
4_Member	GO Biological Processes	GO:0050820	positive regulation of coagulation	-4.25633	-1.97753	3/28	2147,3273,5340	F2,HRG,PLG
4_Member	GO Biological Processes	GO:0051818	disruption of cells of other organism involved in symbiotic interaction	-4.25633	-1.97753	3/28	2147,2597,3273	F2,GAPDH,HRG
4_Member	GO Biological Processes	GO:0051883	killing of cells in other organism involved in symbiotic interaction	-4.25633	-1.97753	3/28	2147,2597,3273	F2,GAPDH,HRG
4_Member	GO Biological Processes	GO:1903036	positive regulation of response to wounding	-4.17321	-1.90718	4/82	2147,3273,5340,7448	F2,HRG,PLG,VTN
4_Member	GO Biological Processes	GO:0051702	interaction with symbiont	-3.99681	-1.74589	4/91	2147,2597,3273,5340	F2,GAPDH,HRG,PLG
4_Member	GO Biological Processes	GO:0001906	cell killing	-3.96952	-1.7223	5/177	735,2147,2597,3075,3273	C9,F2,GAPDH,CFH,HRG
4_Member	Canonical Pathways	M174	PID UPA UPAR PATHWAY	-3.72322	-1.49402	3/42	2244,5340,7448	FGB,PLG,VTN
4_Member	GO Biological Processes	GO:0010810	regulation of cell-substrate adhesion	-3.57625	-1.36095	5/215	335,2244,3273,5340,7448	APOA1,FGB,HRG,PLG,VTN
4_Member	GO Biological Processes	GO:0010811	positive regulation of cell-substrate adhesion	-3.5341	-1.3222	4/120	335,2244,3273,7448	APOA1,FGB,HRG,VTN
4_Member	GO Biological Processes	GO:0031640	killing of cells of other organism	-3.16173	-0.99796	3/65	2147,2597,3273	F2,GAPDH,HRG
4_Member	GO Biological Processes	GO:0044364	disruption of cells of other organism	-3.16173	-0.99796	3/65	2147,2597,3273	F2,GAPDH,HRG
4_Member	GO Biological Processes	GO:0061844	antimicrobial humoral immune response mediated by antimicrobial peptide	-3.0148	-0.874667	3/73	2147,2597,3273	F2,GAPDH,HRG
4_Member	GO Biological Processes	GO:0051851	modification by host of symbiont morphology or physiology	-2.80914	-0.696859	3/86	2147,2597,3273	F2,GAPDH,HRG
4_Member	GO Biological Processes	GO:0031589	cell-substrate adhesion	-2.61278	-0.541649	5/353	335,2244,3273,5340,7448	APOA1,FGB,HRG,PLG,VTN
4_Member	GO Biological Processes	GO:0051817	modification of morphology or physiology of other organism involved in symbiotic interaction	-2.42928	-0.400205	3/117	2147,2597,3273	F2,GAPDH,HRG
4_Member	GO Biological Processes	GO:0098542	defense response to other organism	-2.30869	-0.313862	6/596	2147,2244,2597,3240,3273,3512	F2,FGB,GAPDH,HP,HRG,JCHAIN
4_Member	GO Biological Processes	GO:0007162	negative regulation of cell adhesion	-2.1131	-0.161347	4/294	335,3273,3827,5340	APOA1,HRG,KNG1,PLG
4_Member	GO Biological Processes	GO:0035821	modification of morphology or physiology of other organism	-2.04602	-0.108933	3/161	2147,2597,3273	F2,GAPDH,HRG
5_Summary	Reactome Gene Sets	R-HSA-140877	Formation of Fibrin Clot (Clotting Cascade)	-9.0816	-6.34228	6/39	2,462,2147,2244,3053,3827,335,1356,5340,7466	A2M,SERPINC1,F2,FGB,SERPIND1,KNG1,APOA1,CP,PLG,WFS1
5_Member	Reactome Gene Sets	R-HSA-140877	Formation of Fibrin Clot (Clotting Cascade)	-9.0816	-6.34228	6/39	2,462,2147,2244,3053,3827	A2M,SERPINC1,F2,FGB,SERPIND1,KNG1
5_Member	Reactome Gene Sets	R-HSA-381426	Regulation of Insulin-like Growth Factor (IGF) transport and uptake by Insulin-like Growth Factor Bi	-8.84659	-6.17094	8/125	335,462,1356,2147,3053,3827,5340,7466	APOA1,SERPINC1,CP,F2,SERPIND1,KNG1,PLG,WFS1
5_Member	Reactome Gene Sets	R-HSA-140837	Intrinsic Pathway of Fibrin Clot Formation	-8.44251	-5.7955	5/23	2,462,2147,3053,3827	A2M,SERPINC1,F2,SERPIND1,KNG1
5_Member	GO Biological Processes	GO:0072378	blood coagulation, fibrin clot formation	-8.06598	-5.46288	5/27	2,462,2147,2244,3827	A2M,SERPINC1,F2,FGB,KNG1
5_Member	GO Biological Processes	GO:0007597	blood coagulation, intrinsic pathway	-6.87512	-4.36219	4/18	2,462,2147,3827	A2M,SERPINC1,F2,KNG1
5_Member	Reactome Gene Sets	R-HSA-140875	Common Pathway of Fibrin Clot Formation	-6.50008	-4.00705	4/22	462,2147,2244,3053	SERPINC1,F2,FGB,SERPIND1
5_Member	Reactome Gene Sets	R-HSA-8957275	Post-translational protein phosphorylation	-6.37504	-3.89479	6/108	335,462,1356,3053,3827,7466	APOA1,SERPINC1,CP,SERPIND1,KNG1,WFS1
5_Member	GO Biological Processes	GO:0043687	post-translational protein modification	-3.39419	-1.19236	6/364	335,462,1356,3053,3827,7466	APOA1,SERPINC1,CP,SERPIND1,KNG1,WFS1
6_Summary	GO Biological Processes	GO:0043062	extracellular structure organization	-7.8075	-5.24427	11/429	2,335,337,1291,1293,1634,2244,4060,5340,7148,7448,5549,10135	A2M,APOA1,APOA4,COL6A1,COL6A3,DCN,FGB,LUM,PLG,TNXB,VTN,PRELP,NAMPT
6_Member	GO Biological Processes	GO:0043062	extracellular structure organization	-7.8075	-5.24427	11/429	2,335,337,1291,1293,1634,2244,4060,5340,7148,7448	A2M,APOA1,APOA4,COL6A1,COL6A3,DCN,FGB,LUM,PLG,TNXB,VTN
6_Member	Reactome Gene Sets	R-HSA-3000178	ECM proteoglycans	-7.28858	-4.74762	6/76	1291,1293,1634,4060,7148,7448	COL6A1,COL6A3,DCN,LUM,TNXB,VTN
6_Member	Reactome Gene Sets	R-HSA-1474244	Extracellular matrix organization	-7.01278	-4.49302	9/301	2,1291,1293,1634,2244,4060,5340,7148,7448	A2M,COL6A1,COL6A3,DCN,FGB,LUM,PLG,TNXB,VTN
6_Member	GO Biological Processes	GO:0030198	extracellular matrix organization	-6.22879	-3.75479	9/373	2,1291,1293,1634,2244,4060,5340,7148,7448	A2M,COL6A1,COL6A3,DCN,FGB,LUM,PLG,TNXB,VTN
6_Member	Canonical Pathways	M5884	NABA CORE MATRISOME	-6.18724	-3.71939	8/275	1291,1293,1634,2244,4060,5549,7148,7448	COL6A1,COL6A3,DCN,FGB,LUM,PRELP,TNXB,VTN
6_Member	Reactome Gene Sets	R-HSA-216083	Integrin cell surface interactions	-5.50839	-3.08692	5/85	1291,1293,2244,4060,7448	COL6A1,COL6A3,FGB,LUM,VTN
6_Member	Canonical Pathways	M18	PID INTEGRIN1 PATHWAY	-4.54447	-2.19385	4/66	1291,1293,2244,7448	COL6A1,COL6A3,FGB,VTN
6_Member	Reactome Gene Sets	R-HSA-1474228	Degradation of the extracellular matrix	-4.45274	-2.1159	5/140	2,1291,1293,1634,5340	A2M,COL6A1,COL6A3,DCN,PLG
6_Member	KEGG Pathway	hsa04512	ECM-receptor interaction	-4.17321	-1.90718	4/82	1291,1293,7148,7448	COL6A1,COL6A3,TNXB,VTN
6_Member	Reactome Gene Sets	R-HSA-186797	Signaling by PDGF	-3.30694	-1.11817	3/58	1291,1293,5340	COL6A1,COL6A3,PLG
6_Member	Canonical Pathways	M160	PID AVB3 INTEGRIN PATHWAY	-2.98073	-0.851156	3/75	1291,1293,7448	COL6A1,COL6A3,VTN
6_Member	KEGG Pathway	hsa04510	Focal adhesion	-2.71435	-0.628243	4/199	1291,1293,7148,7448	COL6A1,COL6A3,TNXB,VTN
6_Member	GO Biological Processes	GO:0061448	connective tissue development	-2.19721	-0.2206	4/278	1291,1293,4060,10135	COL6A1,COL6A3,LUM,NAMPT
7_Summary	GO Biological Processes	GO:0006953	acute-phase response	-6.8049	-4.30534	5/47	12,2147,3240,3700,5004,1,847,3043,3848,6709,10135	SERPINA3,F2,HP,ITIH4,ORM1,A1BG,CAT,HBB,KRT1,SPTAN1,NAMPT
7_Member	GO Biological Processes	GO:0006953	acute-phase response	-6.8049	-4.30534	5/47	12,2147,3240,3700,5004	SERPINA3,F2,HP,ITIH4,ORM1
7_Member	GO Biological Processes	GO:0002446	neutrophil mediated immunity	-5.17263	-2.7726	9/502	1,12,847,2147,3043,3240,3848,5004,6709	A1BG,SERPINA3,CAT,F2,HBB,HP,KRT1,ORM1,SPTAN1
7_Member	GO Biological Processes	GO:0002444	myeloid leukocyte mediated immunity	-4.82491	-2.45029	9/555	1,12,847,2147,3043,3240,3848,5004,6709	A1BG,SERPINA3,CAT,F2,HBB,HP,KRT1,ORM1,SPTAN1
7_Member	Reactome Gene Sets	R-HSA-6798695	Neutrophil degranulation	-4.41715	-2.08927	8/480	1,12,847,3043,3240,3848,5004,6709	A1BG,SERPINA3,CAT,HBB,HP,KRT1,ORM1,SPTAN1
7_Member	GO Biological Processes	GO:0043312	neutrophil degranulation	-4.3665	-2.04303	8/488	1,12,847,3043,3240,3848,5004,6709	A1BG,SERPINA3,CAT,HBB,HP,KRT1,ORM1,SPTAN1
7_Member	GO Biological Processes	GO:0002283	neutrophil activation involved in immune response	-4.34775	-2.03725	8/491	1,12,847,3043,3240,3848,5004,6709	A1BG,SERPINA3,CAT,HBB,HP,KRT1,ORM1,SPTAN1
7_Member	GO Biological Processes	GO:0042119	neutrophil activation	-4.2862	-1.98829	8/501	1,12,847,3043,3240,3848,5004,6709	A1BG,SERPINA3,CAT,HBB,HP,KRT1,ORM1,SPTAN1
7_Member	GO Biological Processes	GO:0002274	myeloid leukocyte activation	-4.25781	-1.97753	9/656	1,12,847,3043,3240,3848,5004,6709,10135	A1BG,SERPINA3,CAT,HBB,HP,KRT1,ORM1,SPTAN1,NAMPT
7_Member	GO Biological Processes	GO:0036230	granulocyte activation	-4.24995	-1.97617	8/507	1,12,847,3043,3240,3848,5004,6709	A1BG,SERPINA3,CAT,HBB,HP,KRT1,ORM1,SPTAN1
7_Member	GO Biological Processes	GO:0043299	leukocyte degranulation	-4.07587	-1.81746	8/537	1,12,847,3043,3240,3848,5004,6709	A1BG,SERPINA3,CAT,HBB,HP,KRT1,ORM1,SPTAN1
7_Member	GO Biological Processes	GO:0002275	myeloid cell activation involved in immune response	-4.02035	-1.7657	8/547	1,12,847,3043,3240,3848,5004,6709	A1BG,SERPINA3,CAT,HBB,HP,KRT1,ORM1,SPTAN1
7_Member	GO Biological Processes	GO:0002366	leukocyte activation involved in immune response	-3.25178	-1.07255	8/711	1,12,847,3043,3240,3848,5004,6709	A1BG,SERPINA3,CAT,HBB,HP,KRT1,ORM1,SPTAN1
7_Member	GO Biological Processes	GO:0002263	cell activation involved in immune response	-3.23579	-1.06281	8/715	1,12,847,3043,3240,3848,5004,6709	A1BG,SERPINA3,CAT,HBB,HP,KRT1,ORM1,SPTAN1
8_Summary	GO Biological Processes	GO:0018149	peptide cross-linking	-5.70836	-3.26431	4/34	1634,3848,3849,3858,3852,286887	DCN,KRT1,KRT2,KRT10,KRT5,KRT6C
8_Member	GO Biological Processes	GO:0018149	peptide cross-linking	-5.70836	-3.26431	4/34	1634,3848,3849,3858	DCN,KRT1,KRT2,KRT10
8_Member	GO Biological Processes	GO:0070268	cornification	-4.90176	-2.51715	5/113	3848,3849,3852,3858,286887	KRT1,KRT2,KRT5,KRT10,KRT6C
8_Member	Reactome Gene Sets	R-HSA-6809371	Formation of the cornified envelope	-4.60728	-2.25196	5/130	3848,3849,3852,3858,286887	KRT1,KRT2,KRT5,KRT10,KRT6C
8_Member	Reactome Gene Sets	R-HSA-6805567	Keratinization	-3.58559	-1.36686	5/214	3848,3849,3852,3858,286887	KRT1,KRT2,KRT5,KRT10,KRT6C
8_Member	GO Biological Processes	GO:0031424	keratinization	-3.48542	-1.27691	5/225	3848,3849,3852,3858,286887	KRT1,KRT2,KRT5,KRT10,KRT6C
8_Member	GO Biological Processes	GO:0030216	keratinocyte differentiation	-2.90899	-0.788543	5/302	3848,3849,3852,3858,286887	KRT1,KRT2,KRT5,KRT10,KRT6C
8_Member	GO Biological Processes	GO:0009913	epidermal cell differentiation	-2.57603	-0.5169	5/360	3848,3849,3852,3858,286887	KRT1,KRT2,KRT5,KRT10,KRT6C
8_Member	GO Biological Processes	GO:0043588	skin development	-2.30073	-0.307961	5/418	3848,3849,3852,3858,286887	KRT1,KRT2,KRT5,KRT10,KRT6C
8_Member	GO Biological Processes	GO:0008544	epidermis development	-2.09415	-0.149788	5/469	3848,3849,3852,3858,286887	KRT1,KRT2,KRT5,KRT10,KRT6C
9_Summary	GO Biological Processes	GO:0006957	complement activation, alternative pathway	-5.01362	-2.61879	3/16	629,735,3075,3858,5340	CFB,C9,CFH,KRT10,PLG
9_Member	GO Biological Processes	GO:0006957	complement activation, alternative pathway	-5.01362	-2.61879	3/16	629,735,3075	CFB,C9,CFH
9_Member	KEGG Pathway	hsa05150	Staphylococcus aureus infection	-4.82861	-2.45029	4/56	629,3075,3858,5340	CFB,CFH,KRT10,PLG
10_Summary	Reactome Gene Sets	R-HSA-375165	NCAM signaling for neurite out-growth	-4.62465	-2.26459	4/63	1291,1293,6709,6711,286,335,1465,3849,4060,7148,2147,3852,2244,7448,3273	COL6A1,COL6A3,SPTAN1,SPTBN1,ANK1,APOA1,CSRP1,KRT2,LUM,TNXB,F2,KRT5,FGB,VTN,HRG
10_Member	Reactome Gene Sets	R-HSA-375165	NCAM signaling for neurite out-growth	-4.62465	-2.26459	4/63	1291,1293,6709,6711	COL6A1,COL6A3,SPTAN1,SPTBN1
10_Member	Reactome Gene Sets	R-HSA-445095	Interaction between L1 and Ankyrins	-4.12141	-1.8592	3/31	286,6709,6711	ANK1,SPTAN1,SPTBN1
10_Member	GO Biological Processes	GO:0097435	supramolecular fiber organization	-2.61411	-0.541649	7/698	335,1465,3849,4060,6709,6711,7148	APOA1,CSRP1,KRT2,LUM,SPTAN1,SPTBN1,TNXB
10_Member	Reactome Gene Sets	R-HSA-6807878	COPI-mediated anterograde transport	-2.60962	-0.541089	3/101	286,6709,6711	ANK1,SPTAN1,SPTBN1
10_Member	GO Biological Processes	GO:0006888	ER to Golgi vesicle-mediated transport	-2.60734	-0.541089	4/213	286,2147,6709,6711	ANK1,F2,SPTAN1,SPTBN1
10_Member	Reactome Gene Sets	R-HSA-373760	L1CAM interactions	-2.40863	-0.388379	3/119	286,6709,6711	ANK1,SPTAN1,SPTBN1
10_Member	Reactome Gene Sets	R-HSA-1500931	Cell-Cell communication	-2.31078	-0.313894	3/129	3852,6709,6711	KRT5,SPTAN1,SPTBN1
10_Member	GO Biological Processes	GO:0051258	protein polymerization	-2.13362	-0.170536	4/290	2244,6709,6711,7448	FGB,SPTAN1,SPTBN1,VTN
10_Member	Reactome Gene Sets	R-HSA-199977	ER to Golgi Anterograde Transport	-2.09863	-0.15244	3/154	286,6709,6711	ANK1,SPTAN1,SPTBN1
10_Member	GO Biological Processes	GO:0030036	actin cytoskeleton organization	-2.00311	-0.0731683	6/692	335,1465,3273,6709,6711,7148	APOA1,CSRP1,HRG,SPTAN1,SPTBN1,TNXB
11_Summary	GO Biological Processes	GO:0031639	plasminogen activation	-4.51934	-2.17337	3/23	2244,5230,7123	FGB,PGK1,CLEC3B
11_Member	GO Biological Processes	GO:0031639	plasminogen activation	-4.51934	-2.17337	3/23	2244,5230,7123	FGB,PGK1,CLEC3B
11_Member	GO Biological Processes	GO:0031638	zymogen activation	-3.39848	-1.19332	3/54	2244,5230,7123	FGB,PGK1,CLEC3B
12_Summary	GO Biological Processes	GO:0030168	platelet activation	-4.25524	-1.97753	5/154	1465,2147,2244,3043,3273	CSRP1,F2,FGB,HBB,HRG
12_Member	GO Biological Processes	GO:0030168	platelet activation	-4.25524	-1.97753	5/154	1465,2147,2244,3043,3273	CSRP1,F2,FGB,HBB,HRG
12_Member	GO Biological Processes	GO:0070527	platelet aggregation	-3.26364	-1.08125	3/60	1465,2244,3043	CSRP1,FGB,HBB
12_Member	GO Biological Processes	GO:0034109	homotypic cell-cell adhesion	-2.83853	-0.720822	3/84	1465,2244,3043	CSRP1,FGB,HBB
13_Summary	Canonical Pathways	M5882	NABA PROTEOGLYCANS	-3.96151	-1.72159	3/35	1634,4060,5549,216,2597,5230,3700,286,7448	DCN,LUM,PRELP,ALDH1A1,GAPDH,PGK1,ITIH4,ANK1,VTN
13_Member	Canonical Pathways	M5882	NABA PROTEOGLYCANS	-3.96151	-1.72159	3/35	1634,4060,5549	DCN,LUM,PRELP
13_Member	Reactome Gene Sets	R-HSA-71387	Metabolism of carbohydrates	-3.88456	-1.64824	6/295	216,1634,2597,4060,5230,5549	ALDH1A1,DCN,GAPDH,LUM,PGK1,PRELP
13_Member	Reactome Gene Sets	R-HSA-3560782	Diseases associated with glycosaminoglycan metabolism	-3.75459	-1.52184	3/41	1634,4060,5549	DCN,LUM,PRELP
13_Member	GO Biological Processes	GO:1903510	mucopolysaccharide metabolic process	-3.61921	-1.39702	4/114	1634,3700,4060,5549	DCN,ITIH4,LUM,PRELP
13_Member	GO Biological Processes	GO:0044273	sulfur compound catabolic process	-3.37494	-1.17641	3/55	1634,4060,5549	DCN,LUM,PRELP
13_Member	GO Biological Processes	GO:0006027	glycosaminoglycan catabolic process	-3.24256	-1.06646	3/61	1634,4060,5549	DCN,LUM,PRELP
13_Member	GO Biological Processes	GO:0006026	aminoglycan catabolic process	-3.12327	-0.97148	3/67	1634,4060,5549	DCN,LUM,PRELP
13_Member	GO Biological Processes	GO:0030203	glycosaminoglycan metabolic process	-3.07327	-0.927354	4/159	1634,3700,4060,5549	DCN,ITIH4,LUM,PRELP
13_Member	GO Biological Processes	GO:0006022	aminoglycan metabolic process	-2.95599	-0.830011	4/171	1634,3700,4060,5549	DCN,ITIH4,LUM,PRELP
13_Member	KEGG Pathway	hsa05205	Proteoglycans in cancer	-2.68294	-0.599362	4/203	286,1634,4060,7448	ANK1,DCN,LUM,VTN
13_Member	GO Biological Processes	GO:0006024	glycosaminoglycan biosynthetic process	-2.51587	-0.470919	3/109	1634,4060,5549	DCN,LUM,PRELP
13_Member	GO Biological Processes	GO:0006023	aminoglycan biosynthetic process	-2.46097	-0.42967	3/114	1634,4060,5549	DCN,LUM,PRELP
13_Member	Reactome Gene Sets	R-HSA-1630316	Glycosaminoglycan metabolism	-2.35863	-0.349154	3/124	1634,4060,5549	DCN,LUM,PRELP
13_Member	Reactome Gene Sets	R-HSA-3781865	Diseases of glycosylation	-2.18692	-0.214165	3/143	1634,4060,5549	DCN,LUM,PRELP
14_Summary	GO Biological Processes	GO:0009435	NAD biosynthetic process	-3.35185	-1.15659	3/56	2597,5230,10135,216,23530,847	GAPDH,PGK1,NAMPT,ALDH1A1,NNT,CAT
14_Member	GO Biological Processes	GO:0009435	NAD biosynthetic process	-3.35185	-1.15659	3/56	2597,5230,10135	GAPDH,PGK1,NAMPT
14_Member	GO Biological Processes	GO:0019320	hexose catabolic process	-3.32919	-1.13719	3/57	216,2597,5230	ALDH1A1,GAPDH,PGK1
14_Member	GO Biological Processes	GO:0046365	monosaccharide catabolic process	-3.12327	-0.97148	3/67	216,2597,5230	ALDH1A1,GAPDH,PGK1
14_Member	GO Biological Processes	GO:0019674	NAD metabolic process	-2.94762	-0.824409	3/77	2597,5230,10135	GAPDH,PGK1,NAMPT
14_Member	GO Biological Processes	GO:0019362	pyridine nucleotide metabolic process	-2.77106	-0.666795	4/192	2597,5230,10135,23530	GAPDH,PGK1,NAMPT,NNT
14_Member	GO Biological Processes	GO:0046496	nicotinamide nucleotide metabolic process	-2.77106	-0.666795	4/192	2597,5230,10135,23530	GAPDH,PGK1,NAMPT,NNT
14_Member	GO Biological Processes	GO:0072524	pyridine-containing compound metabolic process	-2.71435	-0.628243	4/199	2597,5230,10135,23530	GAPDH,PGK1,NAMPT,NNT
14_Member	GO Biological Processes	GO:0006733	oxidoreduction coenzyme metabolic process	-2.62214	-0.545834	4/211	2597,5230,10135,23530	GAPDH,PGK1,NAMPT,NNT
14_Member	KEGG Pathway	hsa01200	Carbon metabolism	-2.46097	-0.42967	3/114	847,2597,5230	CAT,GAPDH,PGK1
14_Member	GO Biological Processes	GO:0019359	nicotinamide nucleotide biosynthetic process	-2.15397	-0.187048	3/147	2597,5230,10135	GAPDH,PGK1,NAMPT
14_Member	GO Biological Processes	GO:0019363	pyridine nucleotide biosynthetic process	-2.15397	-0.187048	3/147	2597,5230,10135	GAPDH,PGK1,NAMPT
14_Member	GO Biological Processes	GO:0072525	pyridine-containing compound biosynthetic process	-2.1299	-0.168734	3/150	2597,5230,10135	GAPDH,PGK1,NAMPT
15_Summary	GO Biological Processes	GO:0050777	negative regulation of immune response	-3.10411	-0.955268	4/156	2,259,335,722,2147,3848,3313	A2M,AMBP,APOA1,C4BPA,F2,KRT1,HSPA9
15_Member	GO Biological Processes	GO:0050777	negative regulation of immune response	-3.10411	-0.955268	4/156	2,259,335,722	A2M,AMBP,APOA1,C4BPA
15_Member	GO Biological Processes	GO:0002698	negative regulation of immune effector process	-2.37836	-0.362453	3/122	2,335,722	A2M,APOA1,C4BPA
15_Member	GO Biological Processes	GO:0031348	negative regulation of defense response	-2.34662	-0.339272	4/252	2,335,2147,3848	A2M,APOA1,F2,KRT1
15_Member	GO Biological Processes	GO:0002683	negative regulation of immune system process	-2.04221	-0.106924	5/483	2,259,335,722,3313	A2M,AMBP,APOA1,C4BPA,HSPA9
16_Summary	KEGG Pathway	hsa03320	PPAR signaling pathway	-3.0322	-0.889188	3/72	335,5346,729359	APOA1,PLIN1,PLIN4
16_Member	KEGG Pathway	hsa03320	PPAR signaling pathway	-3.0322	-0.889188	3/72	335,5346,729359	APOA1,PLIN1,PLIN4
17_Summary	GO Biological Processes	GO:0001895	retina homeostasis	-2.98073	-0.851156	3/75	3512,3848,5304,12,5340,10575,216,7466	JCHAIN,KRT1,PIP,SERPINA3,PLG,CCT4,ALDH1A1,WFS1
17_Member	GO Biological Processes	GO:0001895	retina homeostasis	-2.98073	-0.851156	3/75	3512,3848,5304	JCHAIN,KRT1,PIP
17_Member	GO Biological Processes	GO:0060249	anatomical structure homeostasis	-2.97993	-0.851156	6/437	12,3512,3848,5304,5340,10575	SERPINA3,JCHAIN,KRT1,PIP,PLG,CCT4
17_Member	GO Biological Processes	GO:0048871	multicellular organismal homeostasis	-2.7406	-0.641602	6/487	12,216,3512,3848,5304,7466	SERPINA3,ALDH1A1,JCHAIN,KRT1,PIP,WFS1
17_Member	GO Biological Processes	GO:0001894	tissue homeostasis	-2.50795	-0.465305	4/227	12,3512,3848,5304	SERPINA3,JCHAIN,KRT1,PIP
18_Summary	GO Biological Processes	GO:0031647	regulation of protein stability	-2.98045	-0.851156	5/291	335,2597,4000,7466,10575,2147,2273,3313	APOA1,GAPDH,LMNA,WFS1,CCT4,F2,FHL1,HSPA9
18_Member	GO Biological Processes	GO:0031647	regulation of protein stability	-2.98045	-0.851156	5/291	335,2597,4000,7466,10575	APOA1,GAPDH,LMNA,WFS1,CCT4
18_Member	GO Biological Processes	GO:0050821	protein stabilization	-2.83011	-0.71512	4/185	335,2597,7466,10575	APOA1,GAPDH,WFS1,CCT4
18_Member	GO Biological Processes	GO:1900180	regulation of protein localization to nucleus	-2.36845	-0.356842	3/123	2147,4000,10575	F2,LMNA,CCT4
18_Member	GO Biological Processes	GO:0043270	positive regulation of ion transport	-2.20266	-0.223995	4/277	335,2147,2273,7466	APOA1,F2,FHL1,WFS1
18_Member	GO Biological Processes	GO:0034620	cellular response to unfolded protein	-2.17032	-0.199518	3/145	3313,4000,7466	HSPA9,LMNA,WFS1
18_Member	GO Biological Processes	GO:0035967	cellular response to topologically incorrect protein	-2.02425	-0.0907503	3/164	3313,4000,7466	HSPA9,LMNA,WFS1
19_Summary	GO Biological Processes	GO:0007568	aging	-2.80422	-0.694625	5/319	847,1634,4000,5549,10135,5230,6649	CAT,DCN,LMNA,PRELP,NAMPT,PGK1,SOD3
19_Member	GO Biological Processes	GO:0007568	aging	-2.80422	-0.694625	5/319	847,1634,4000,5549,10135	CAT,DCN,LMNA,PRELP,NAMPT
19_Member	GO Biological Processes	GO:0036293	response to decreased oxygen levels	-2.52497	-0.474454	5/370	847,4000,5230,6649,10135	CAT,LMNA,PGK1,SOD3,NAMPT
19_Member	GO Biological Processes	GO:0007569	cell aging	-2.41891	-0.393499	3/118	4000,5549,10135	LMNA,PRELP,NAMPT
19_Member	GO Biological Processes	GO:0070482	response to oxygen levels	-2.40878	-0.388379	5/394	847,4000,5230,6649,10135	CAT,LMNA,PGK1,SOD3,NAMPT
20_Summary	GO Biological Processes	GO:0014068	positive regulation of phosphatidylinositol 3-kinase signaling	-2.76639	-0.664772	3/89	847,1634,2147,335,3273,4060,7123,7448	CAT,DCN,F2,APOA1,HRG,LUM,CLEC3B,VTN
20_Member	GO Biological Processes	GO:0014068	positive regulation of phosphatidylinositol 3-kinase signaling	-2.76639	-0.664772	3/89	847,1634,2147	CAT,DCN,F2
20_Member	GO Biological Processes	GO:0070848	response to growth factor	-2.48633	-0.450527	7/736	335,847,1634,3273,4060,7123,7448	APOA1,CAT,DCN,HRG,LUM,CLEC3B,VTN
20_Member	GO Biological Processes	GO:0014066	regulation of phosphatidylinositol 3-kinase signaling	-2.32019	-0.317051	3/128	847,1634,2147	CAT,DCN,F2
20_Member	GO Biological Processes	GO:0014065	phosphatidylinositol 3-kinase signaling	-2.11416	-0.161347	3/152	847,1634,2147	CAT,DCN,F2
